# Supplementary material (part 5 of 7)
Source: ML conference proceedings conference paper supplement (https://openreview.net/forum?id=aJjO6dzKQ3M)

DQN L-H-D ( $\sigma=0.6$ )

action hist for p0 in ]0.6, 0.4]

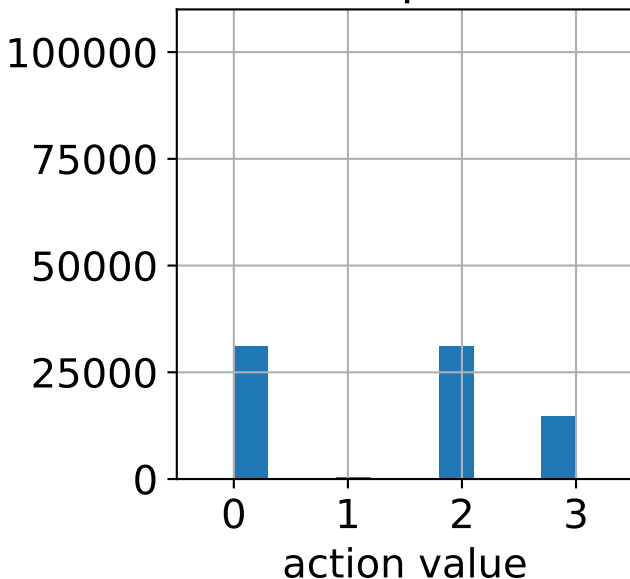

Supplement: supplementary_material [file attachment]

DQN L-T-V ( $\sigma=0.4$ )

action hist for p0 in ]0.6, 0.4]

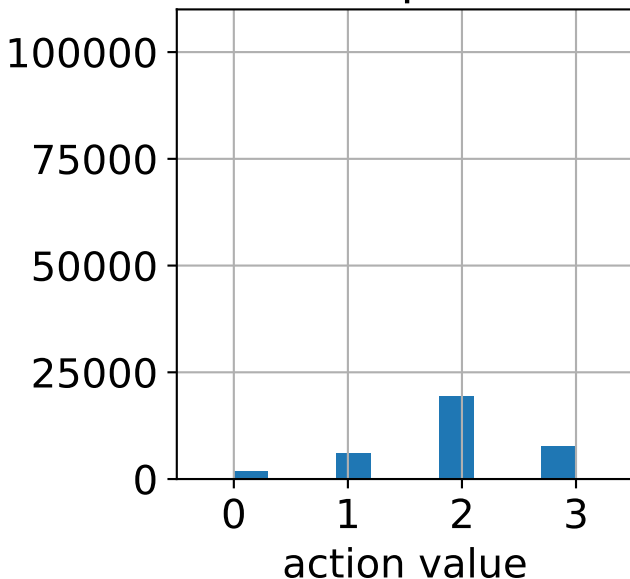

Supplement: supplementary_material [file attachment]

# REINFORCE P-T-V ( $\sigma=0.4$ ) action hist for $p_0 < 0.2$

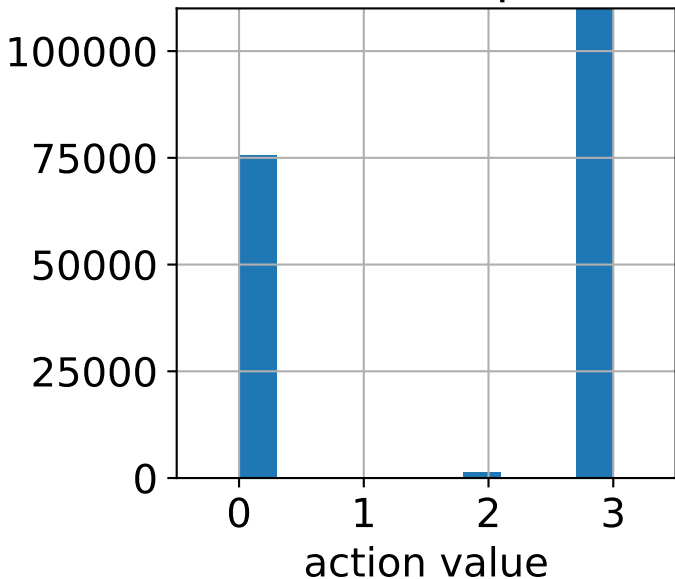

Supplement: supplementary_material [file attachment]

# REINFORCE C-H-D-V ( $\sigma=0.4$ ) action hist for p0 in ]0.6, 0.4]

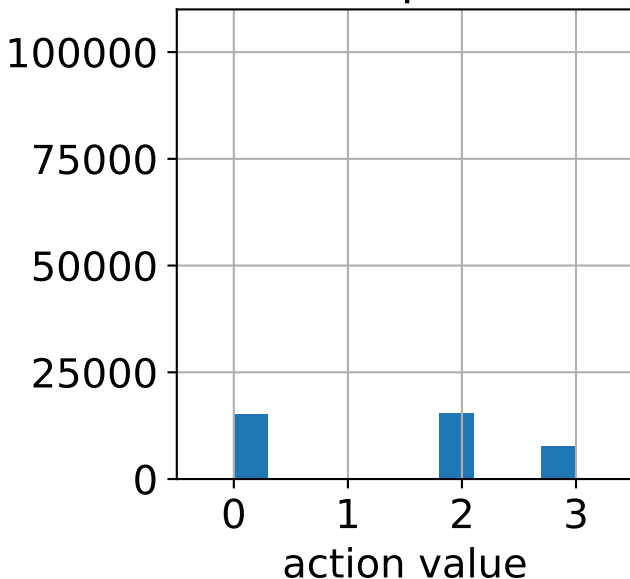

Supplement: supplementary_material [file attachment]

DQN P-H-D-V ( $\sigma=0.4$ )  
action hist for p0 in ]0.8, 0.6]

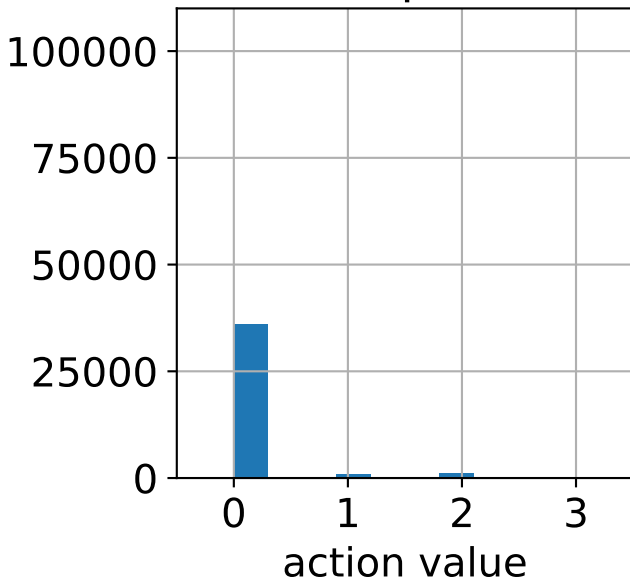

Supplement: supplementary_material [file attachment]

# REINFORCE P-T vs. DQN P-T

$\delta d = 0.1$   $\varepsilon d = 0.2$

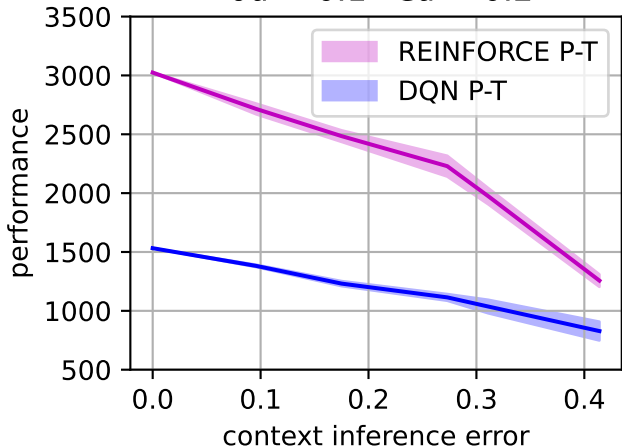

Supplement: supplementary_material [file attachment]

# REINFORCE P-H-D ( $\sigma=0.6$ ) action hist for p0 in ]0.6, 0.4]

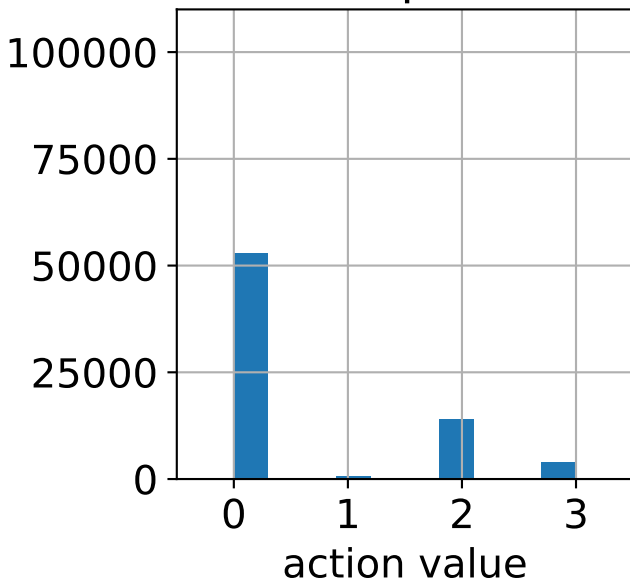

Supplement: supplementary_material [file attachment]

# REINFORCE P-H-D-V ( $\sigma=0.4$ ) action hist for $p_0 < 0.2$

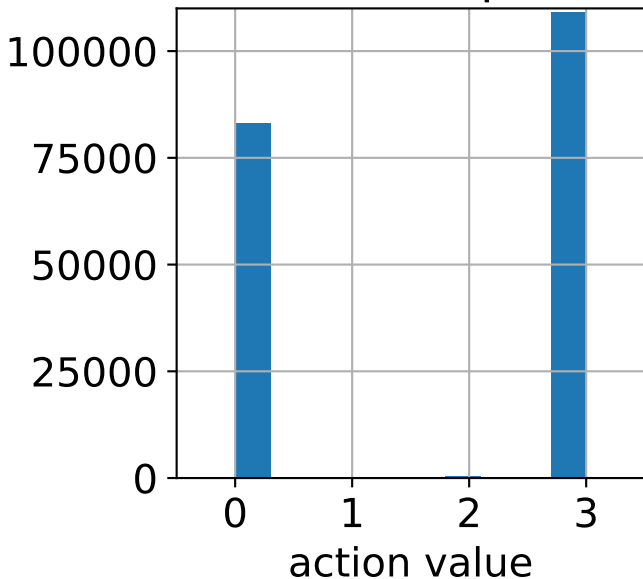

Supplement: supplementary_material [file attachment]

# REINFORCE C-H-D-V ( $\sigma=0.4$ ) action hist for $p_0 < 0.2$

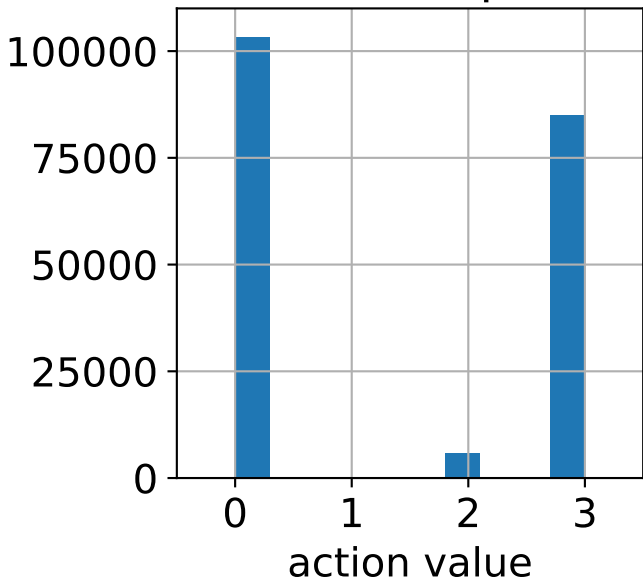

Supplement: supplementary_material [file attachment]

DQN P-H-D vs. L-H-D  
 $\delta d = 0.2$   $\epsilon d = 0.2$

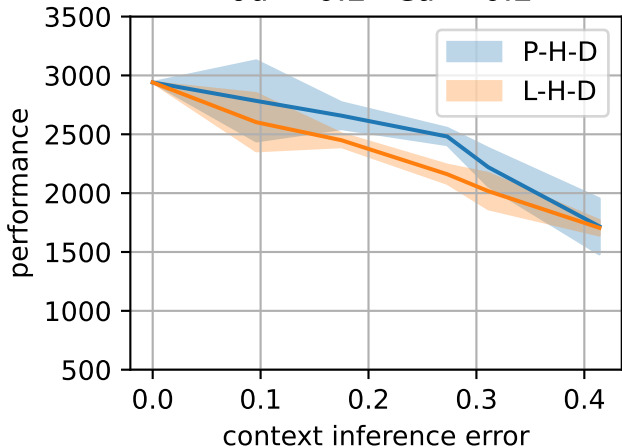

Supplement: supplementary_material [file attachment]

# REINFORCE L-T performance ( $\sigma=0.6$ )

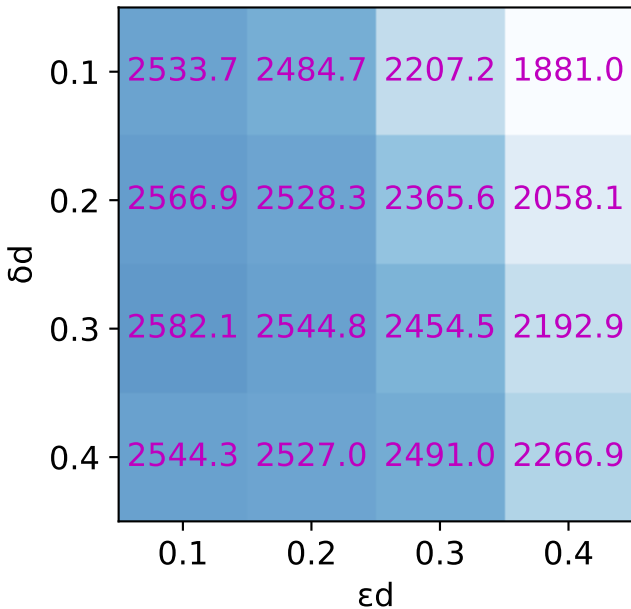

Supplement: supplementary_material [file attachment]

# REINFORCE C-H-D ( $\sigma=0.6$ ) action hist for p0 in ]0.4, 0.2]

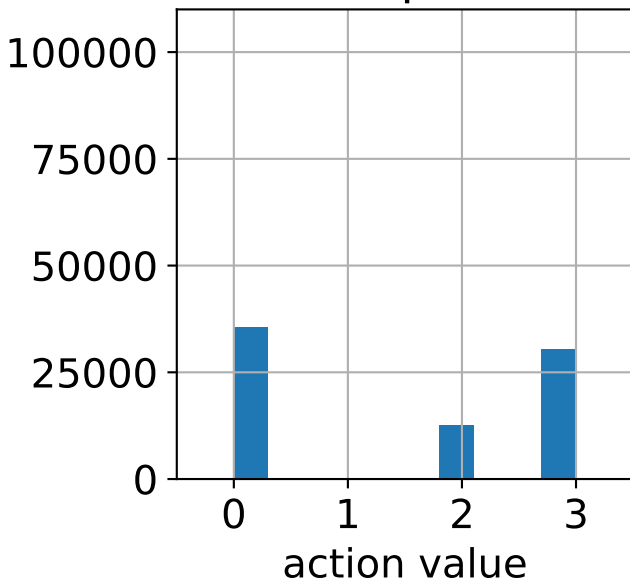

Supplement: supplementary_material [file attachment]

DQN P-H-D-V ( $\sigma=0.4$ )  
action hist for p0 in ]0.4, 0.2]

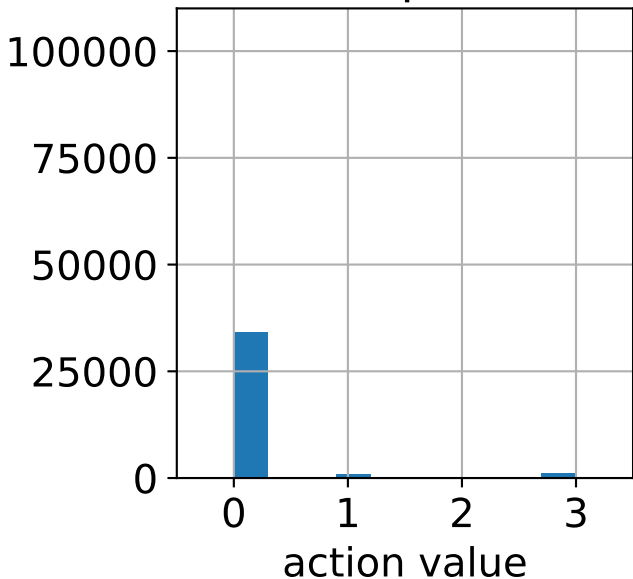

Supplement: supplementary_material [file attachment]

# REINFORCE P-H-D-V ( $\sigma=0.4$ ) action hist for p0 in ]0.8, 0.6]

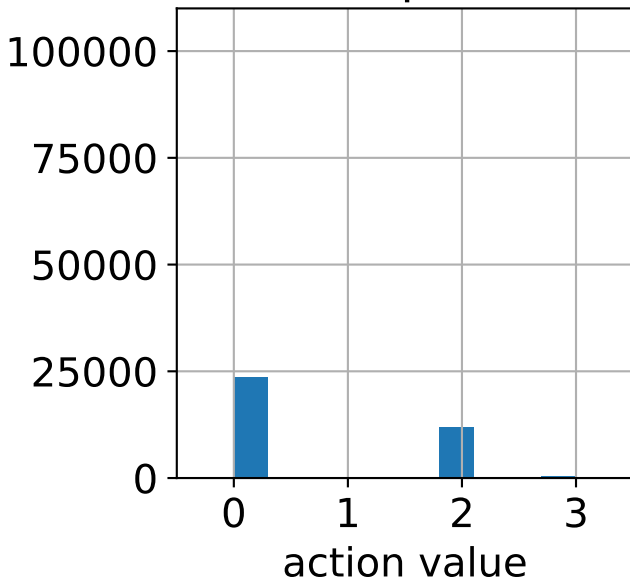

Supplement: supplementary_material [file attachment]

# REINFORCE L-H-D ( $\sigma=0.6$ ) action hist for p0 in ]0.6, 0.4]

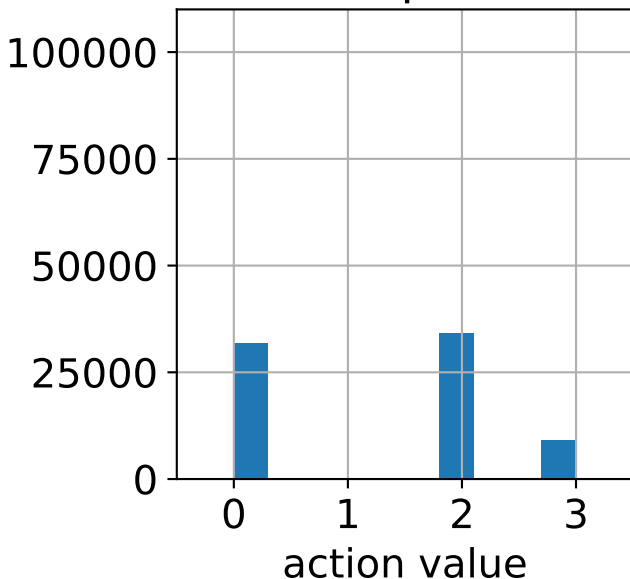

Supplement: supplementary_material [file attachment]

DQN C-T-V ( $\sigma=0.4$ )  
action hist for  $p_0 < 0.2$

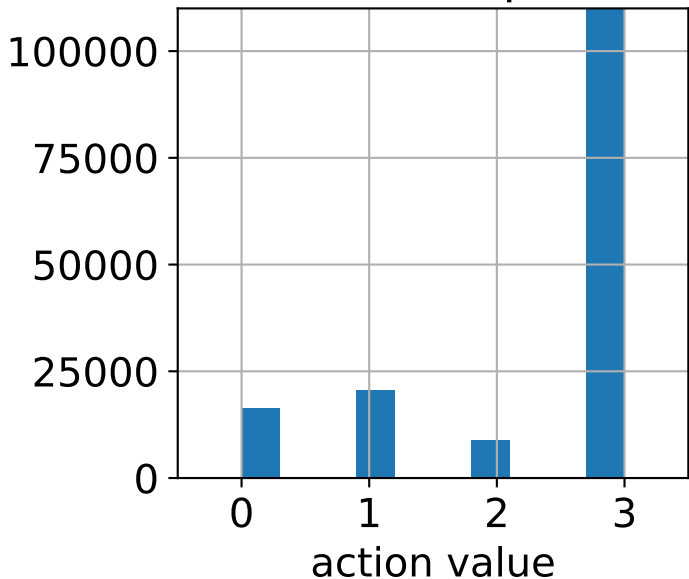

Supplement: supplementary_material [file attachment]

# DQN L-H-D performance ( $\sigma=2$ )

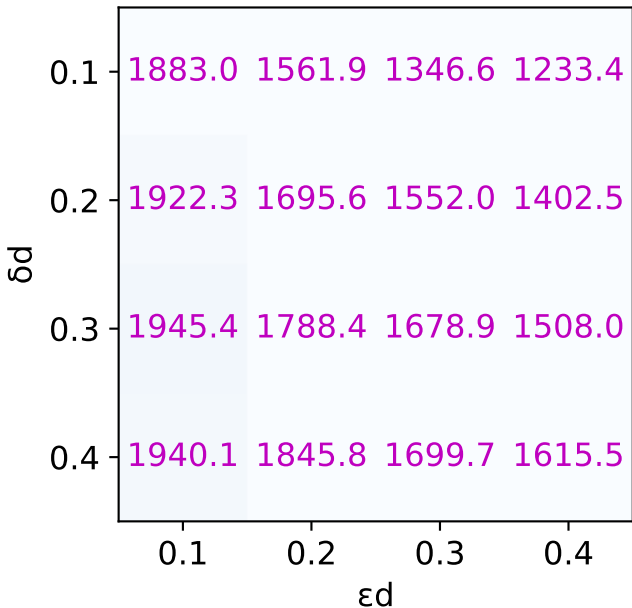

Supplement: supplementary_material [file attachment]

# REINFORCE P-H-D vs. L-H-D

$\delta d = 0.4$     $\varepsilon d = 0.3$

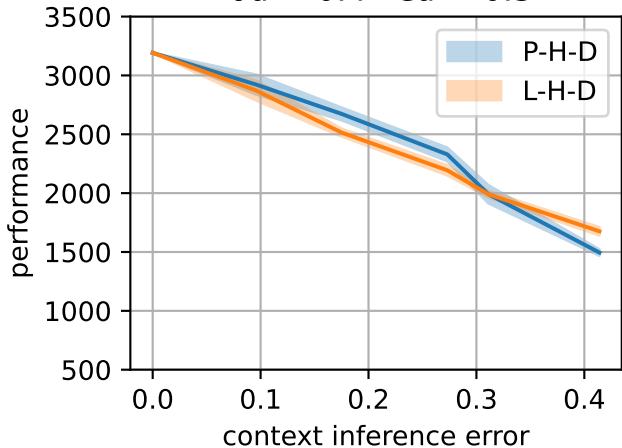

Supplement: supplementary_material [file attachment]

Training P-T ( $\sigma=0.4$ )

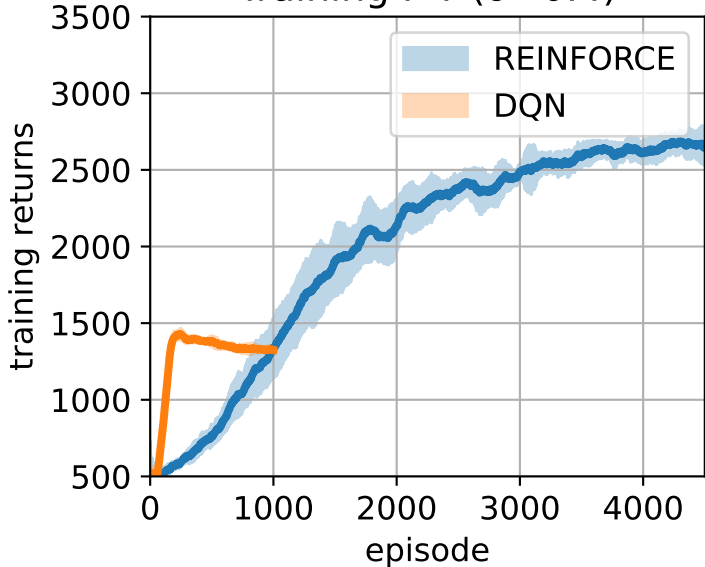

Supplement: supplementary_material [file attachment]

DQN L-T-V ( $\sigma=0.4$ )

action hist for p0 in ]0.6, 0.4]

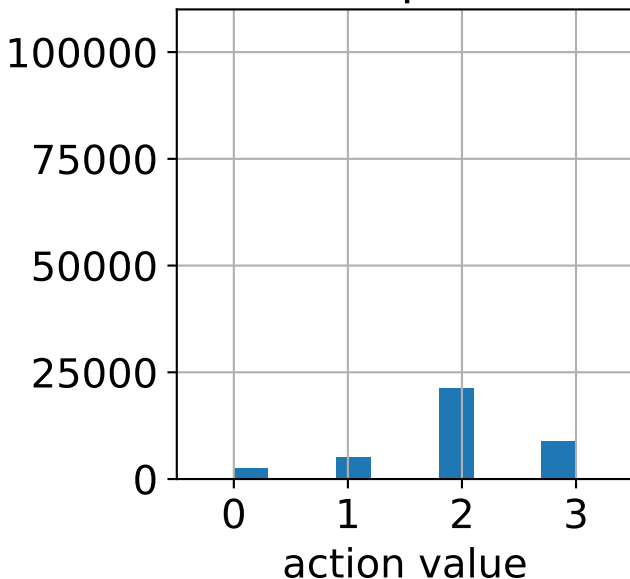

Supplement: supplementary_material [file attachment]

DQN P-H-D-V ( $\sigma=0.4$ )  
action hist for p0 in ]0.8, 0.6]

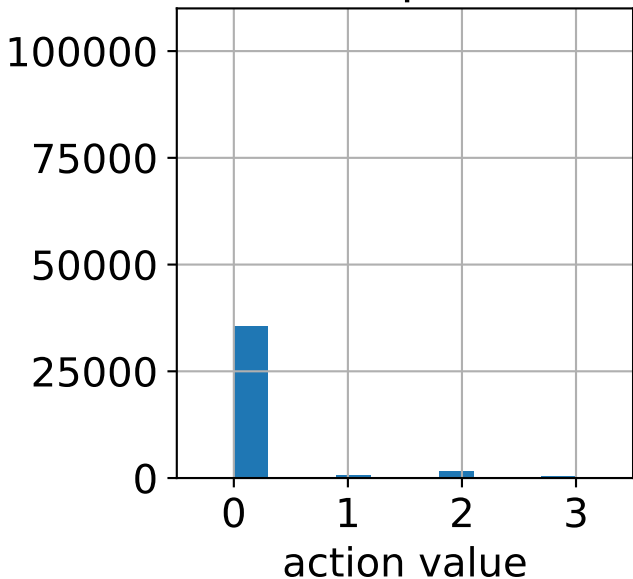

Supplement: supplementary_material [file attachment]

# REINFORCE L-T vs. DQN L-T

$\delta d = 0.1$   $\varepsilon d = 0.1$

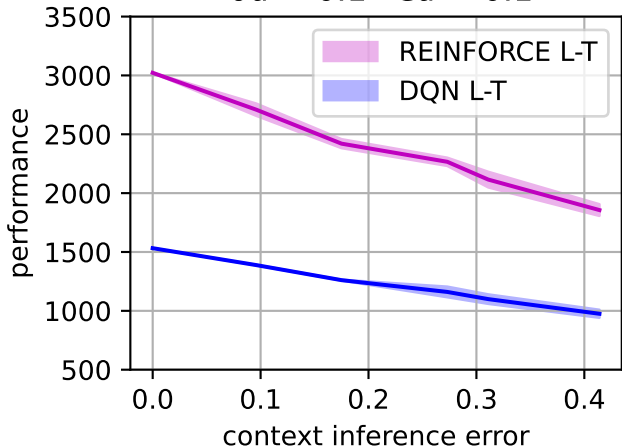

Supplement: supplementary_material [file attachment]

DQN P-H-D-V ( $\sigma=0.4$ )  
action hist for p0 in ]0.8, 0.6]

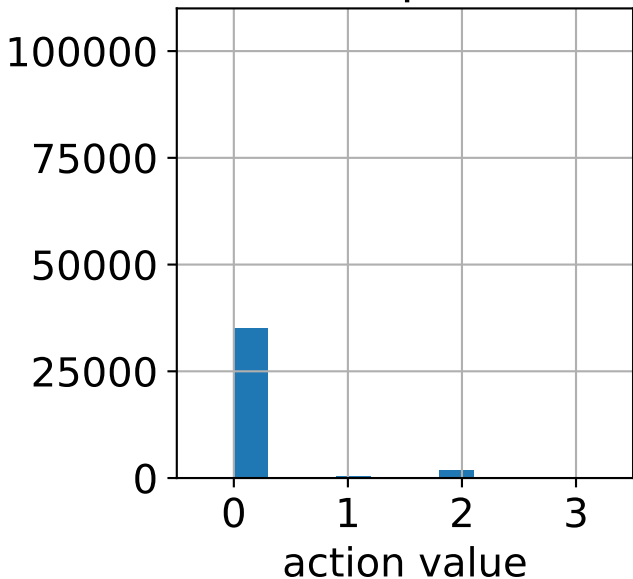

Supplement: supplementary_material [file attachment]

# REINFORCE L-H-D ( $\sigma=0.6$ ) action hist for p0 in ]0.6, 0.4]

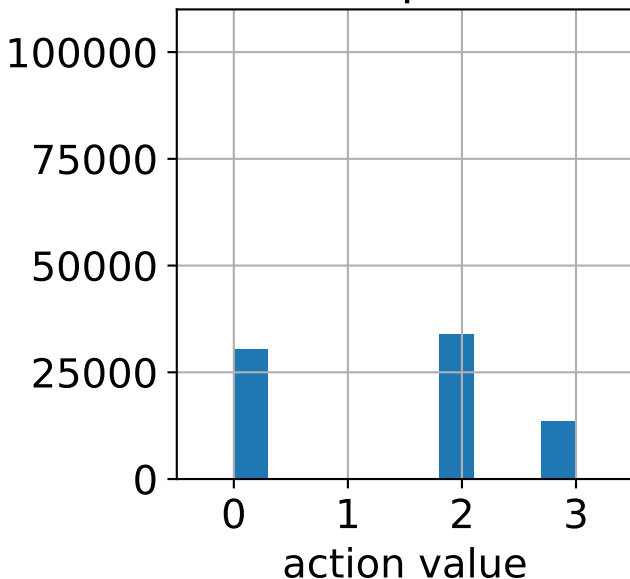

Supplement: supplementary_material [file attachment]

DQN C-H-D ( $\sigma=0.6$ )

action hist for p0 in ]0.8, 0.6]

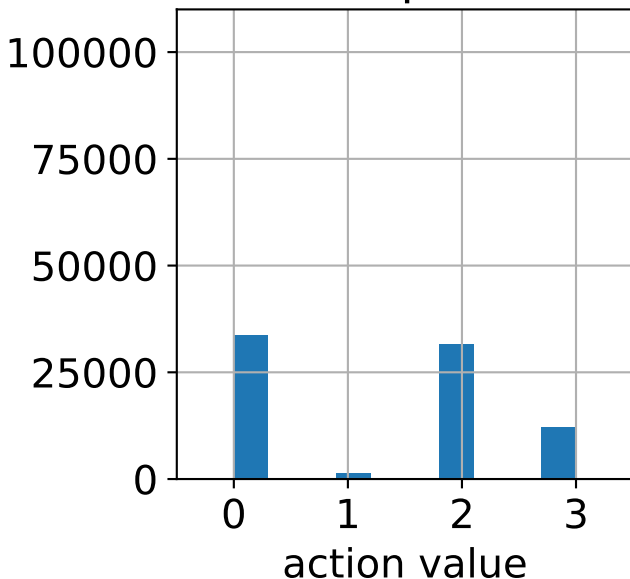

Supplement: supplementary_material [file attachment]

# REINFORCE C-T ( $\sigma=0.6$ ) action hist for $p_0 \geq 0.8$

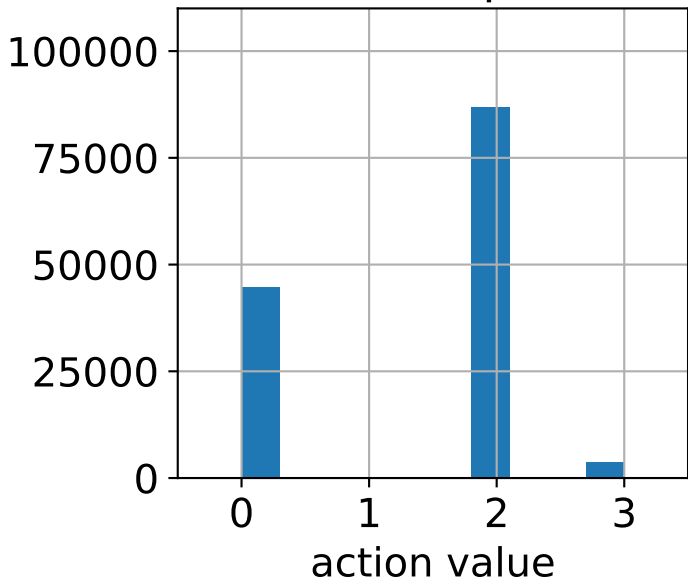

Supplement: supplementary_material [file attachment]

# REINFORCE P-H-D vs. L-H-D

$\delta d = 0.4$     $\varepsilon d = 0.4$

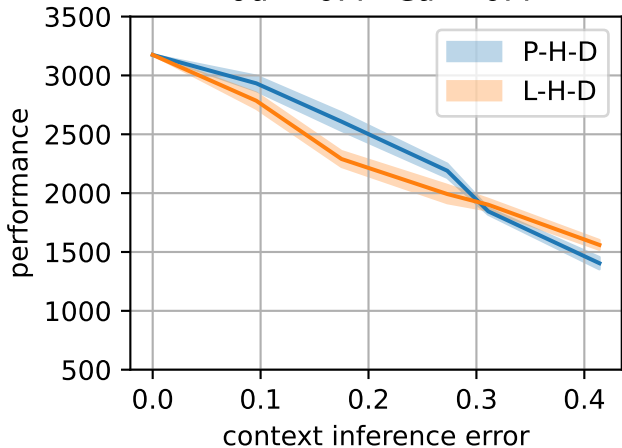

Supplement: supplementary_material [file attachment]

# DQN P-T performance ( $\sigma=1$ )

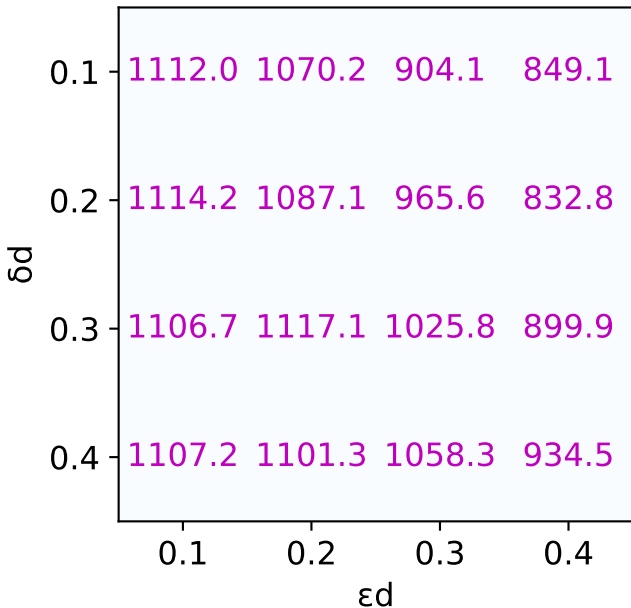

Supplement: supplementary_material [file attachment]

DQN L-H-D-V ( $\sigma=0.4$ )  
action hist for p0 in ]0.4, 0.2]

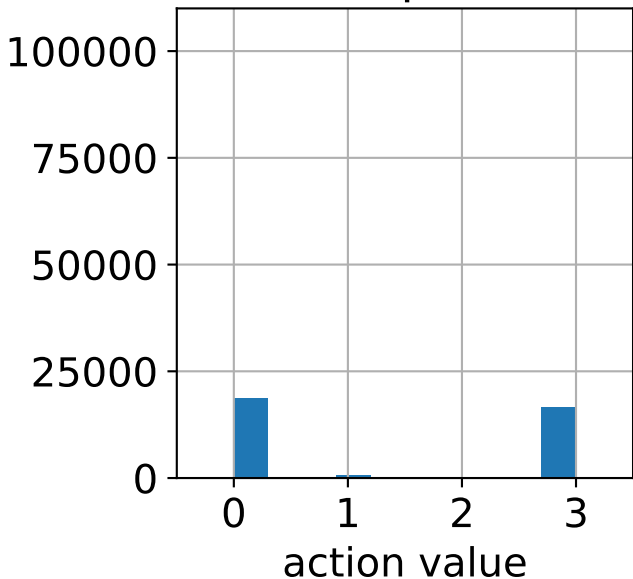

Supplement: supplementary_material [file attachment]

DQN C-H-D ( $\sigma=0.6$ )  
action hist for  $p_0 \geq 0.8$

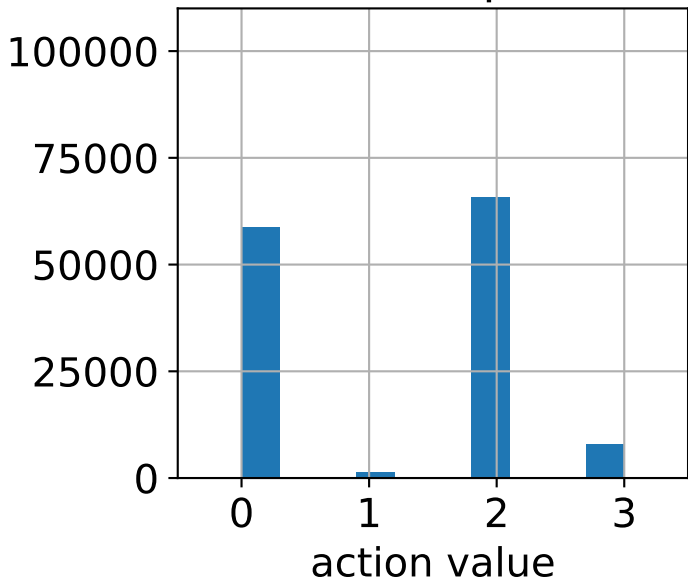

Supplement: supplementary_material [file attachment]

# REINFORCE C-T ( $\sigma=0.6$ ) action hist for $p_0 \geq 0.8$

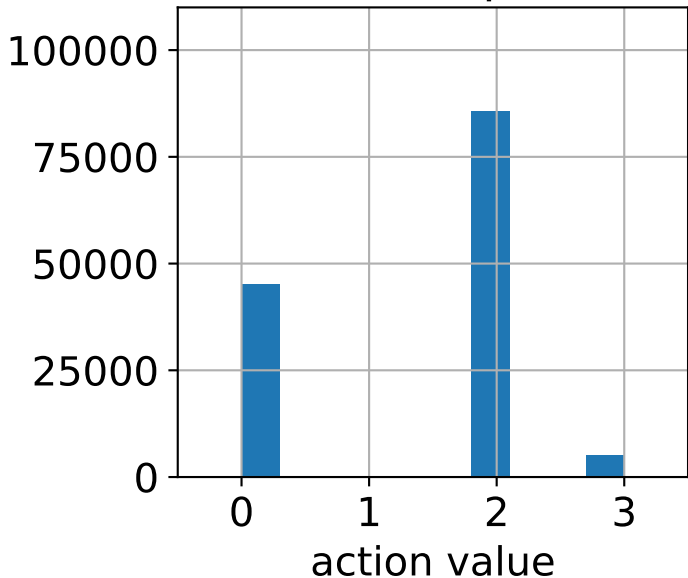

Supplement: supplementary_material [file attachment]

# REINFORCE L-T vs. DQN L-T

$\delta d = 0.1$     $\epsilon d = 0.2$

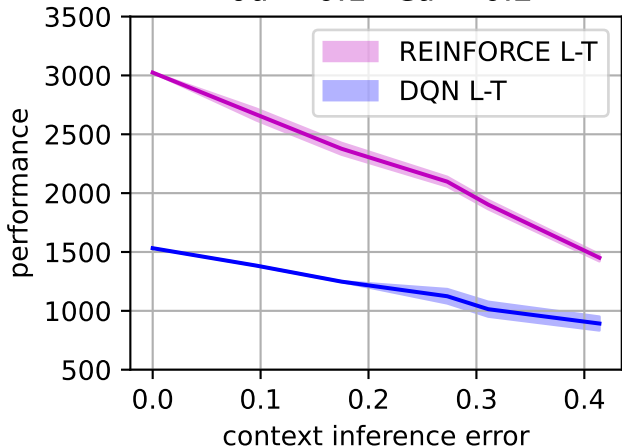

Supplement: supplementary_material [file attachment]

DQN L-H-D ( $\sigma=0.6$ )

action hist for p0 in ]0.8, 0.6]

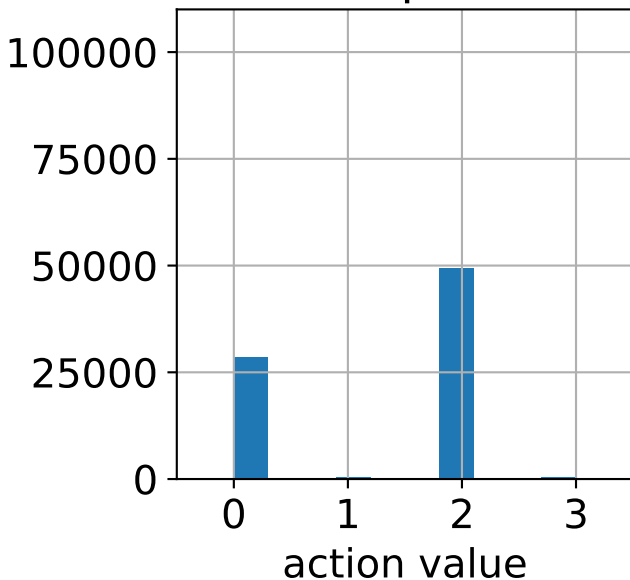

Supplement: supplementary_material [file attachment]

# REINFORCE P-T ( $\sigma=0.6$ ) action hist for p0 in ]0.6, 0.4]

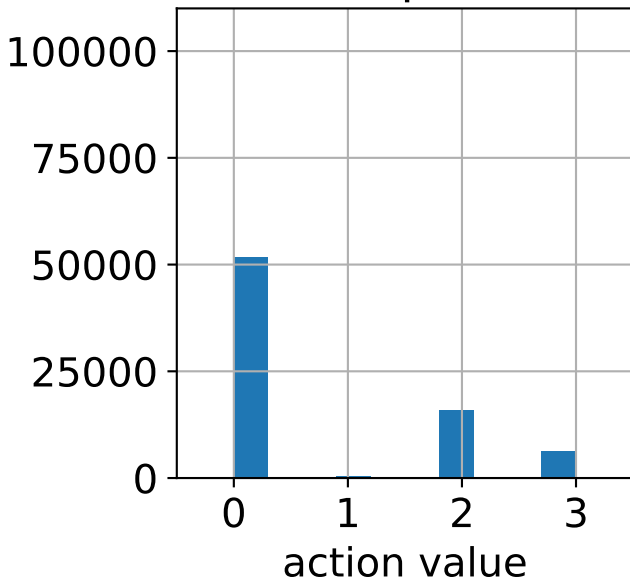

Supplement: supplementary_material [file attachment]

# REINFORCE C-T-V ( $\sigma=0.4$ ) action hist for $p_0 \geq 0.8$

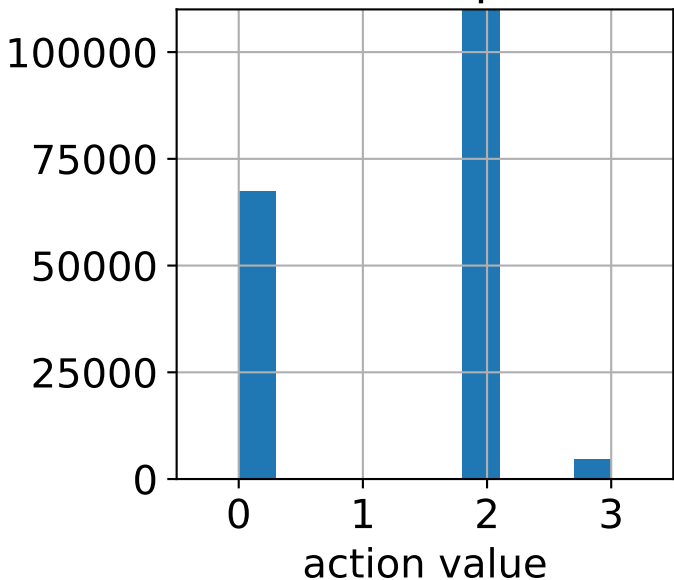

Supplement: supplementary_material [file attachment]

# REINFORCE C-T ( $\sigma=0.6$ ) action hist for $p_0 < 0.2$

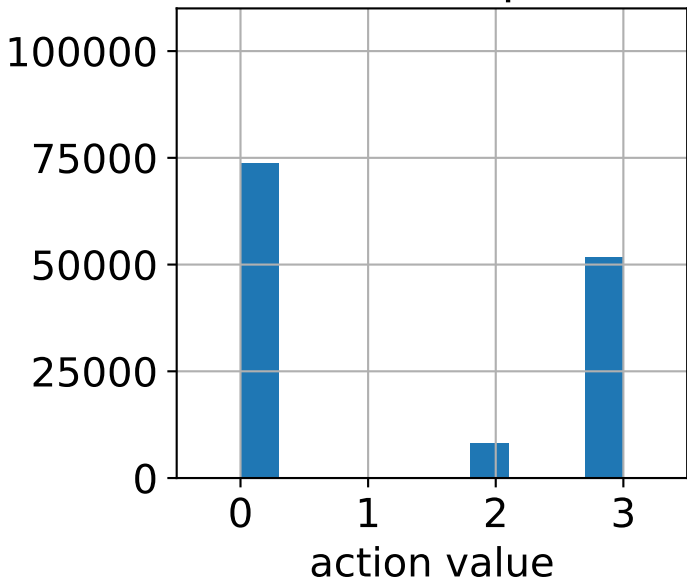

Supplement: supplementary_material [file attachment]

# REINFORCE P-H-D-V ( $\sigma=0.4$ ) action hist for p0 in ]0.6, 0.4]

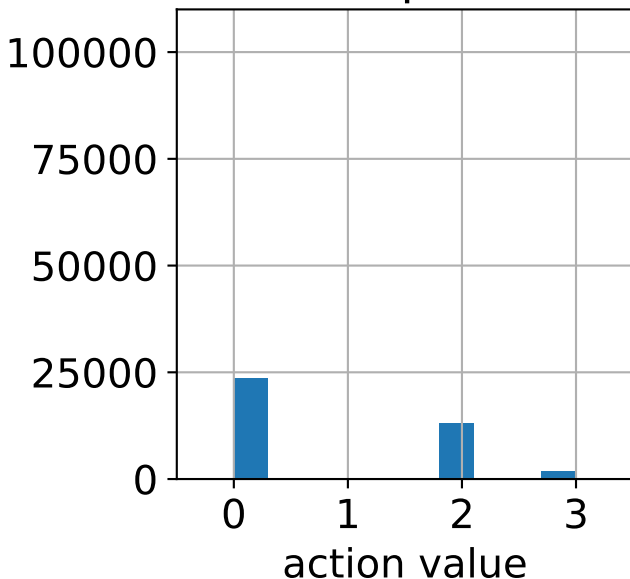

Supplement: supplementary_material [file attachment]

DQN C-T-V ( $\sigma=0.4$ )

action hist for p0 in ]0.6, 0.4]

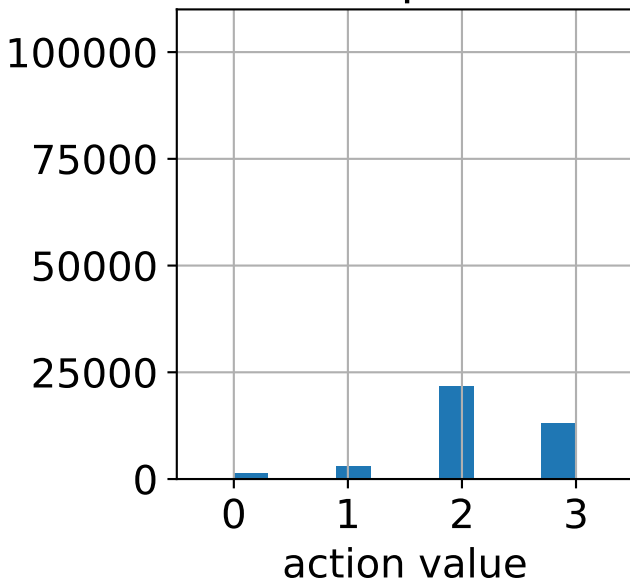

Supplement: supplementary_material [file attachment]

# REINFORCE C-T-V ( $\sigma=0.4$ ) action hist for $p_0 \geq 0.8$

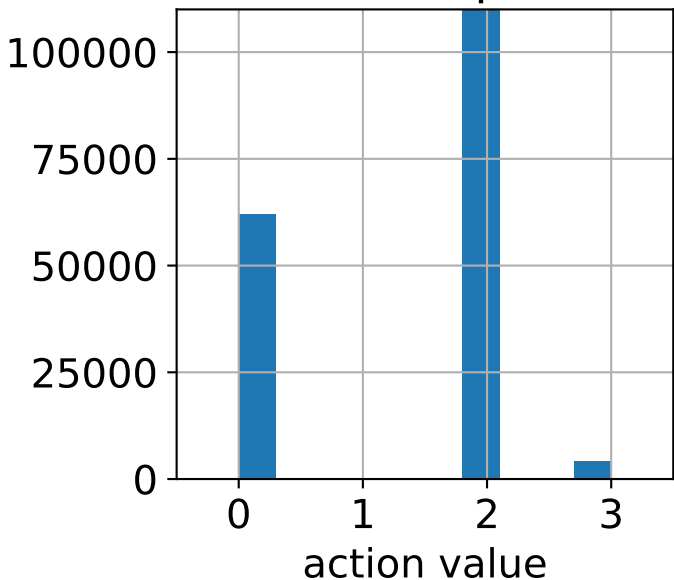

Supplement: supplementary_material [file attachment]

DQN P-T-V ( $\sigma=0.4$ )  
action hist for  $p_0 < 0.2$

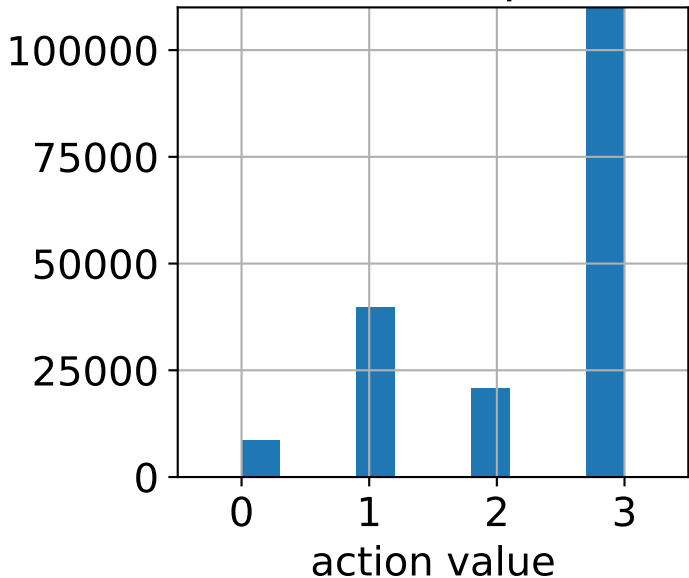

Supplement: supplementary_material [file attachment]

DQN P-T-V ( $\sigma=0.4$ )  
action hist for  $p_0 \geq 0.8$

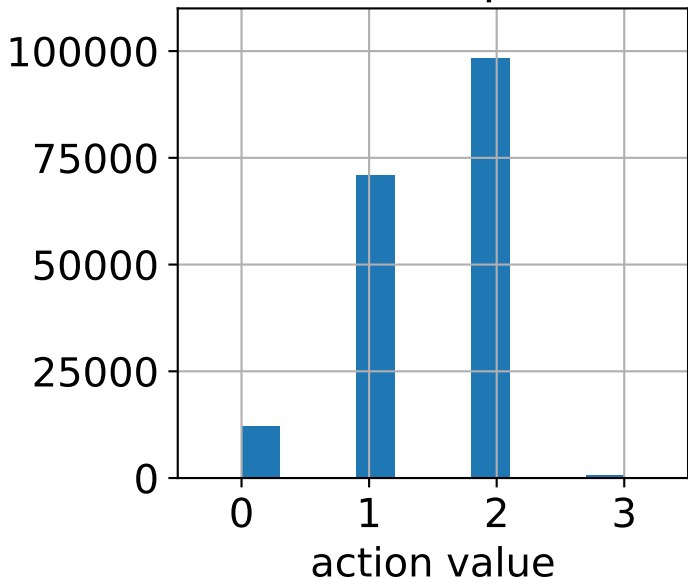

Supplement: supplementary_material [file attachment]

REINFORCE P-T vs. L-T  
performance difference ( $\sigma=0.6$ )

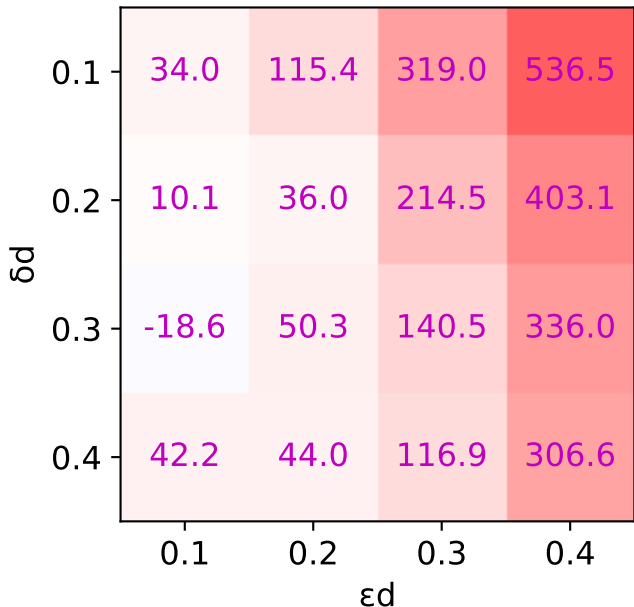

Supplement: supplementary_material [file attachment]

# REINFORCE L-T vs. DQN L-T

$\delta d = 0.3$   $\epsilon d = 0.2$

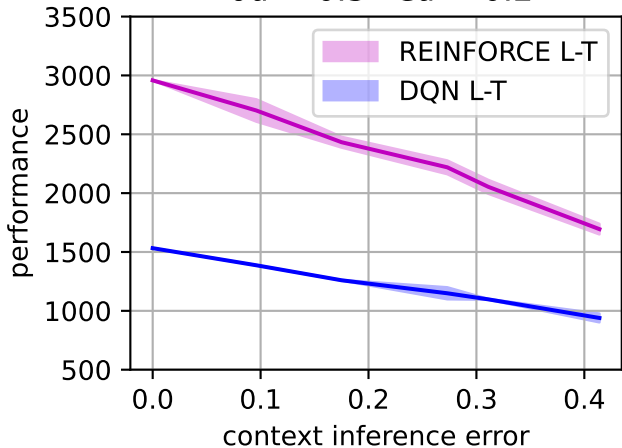

Supplement: supplementary_material [file attachment]

DQN C-H-D ( $\sigma=0.6$ )

action hist for p0 in ]0.8, 0.6]

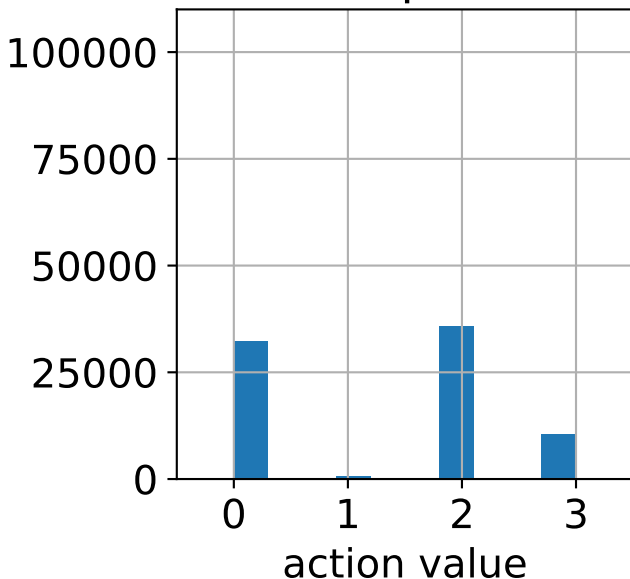

Supplement: supplementary_material [file attachment]

# REINFORCE L-T vs. DQN L-T

$\delta d = 0.3$   $\epsilon d = 0.4$

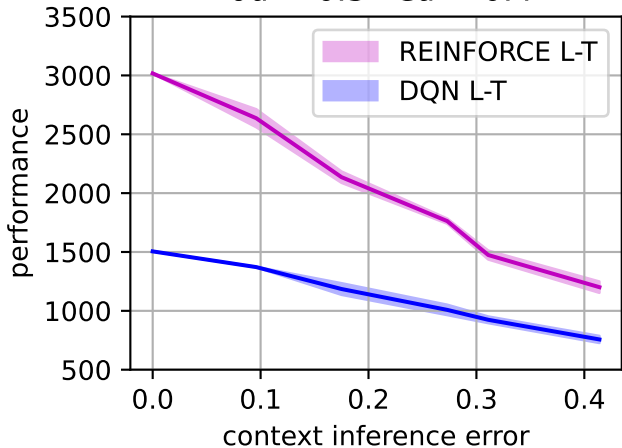

Supplement: supplementary_material [file attachment]

# REINFORCE P-H-D-V ( $\sigma=0.4$ ) action hist for $p_0 < 0.2$

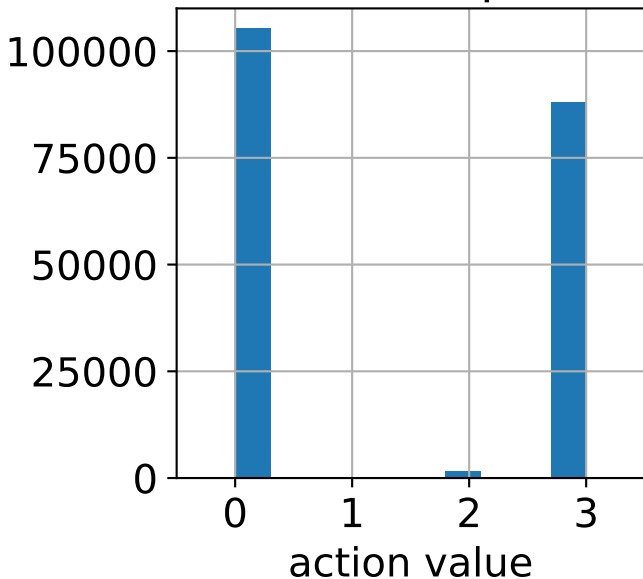

Supplement: supplementary_material [file attachment]

# REINFORCE P-T-V ( $\sigma=0.4$ ) action hist for $p_0 \geq 0.8$

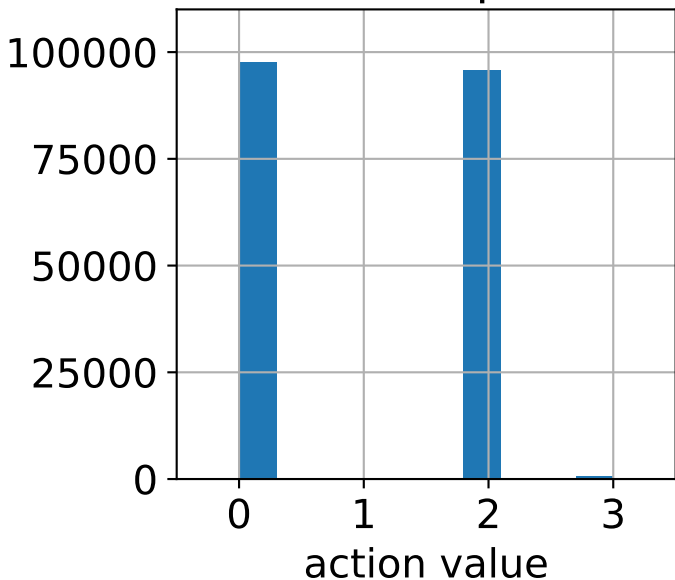

Supplement: supplementary_material [file attachment]

# REINFORCE P-H-D ( $\sigma=0.6$ ) action hist for p0 in ]0.6, 0.4]

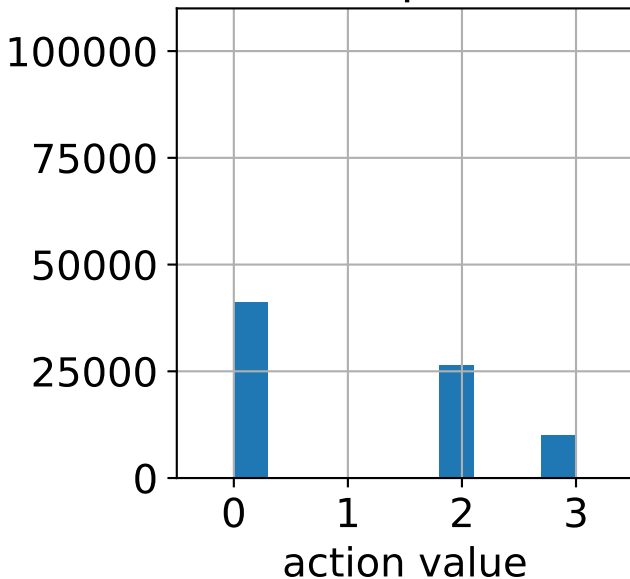

Supplement: supplementary_material [file attachment]

DQN P-H-D ( $\sigma=0.6$ )

action hist for p0 in ]0.8, 0.6]

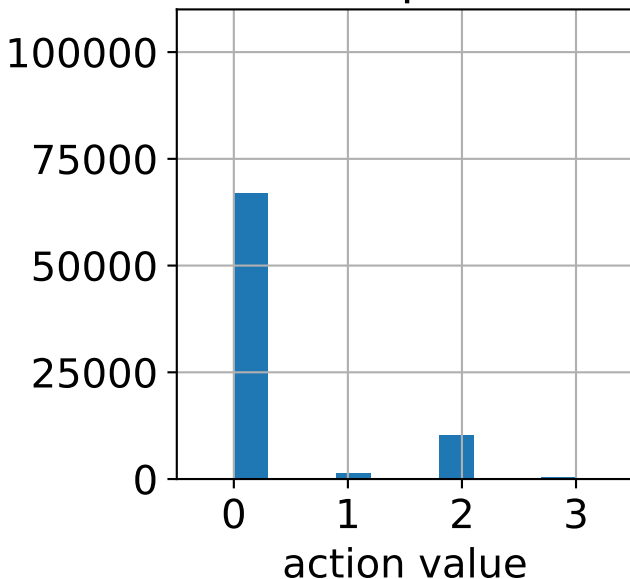

Supplement: supplementary_material [file attachment]

DQN C-T-V ( $\sigma=0.4$ )  
action hist for  $p_0 \geq 0.8$

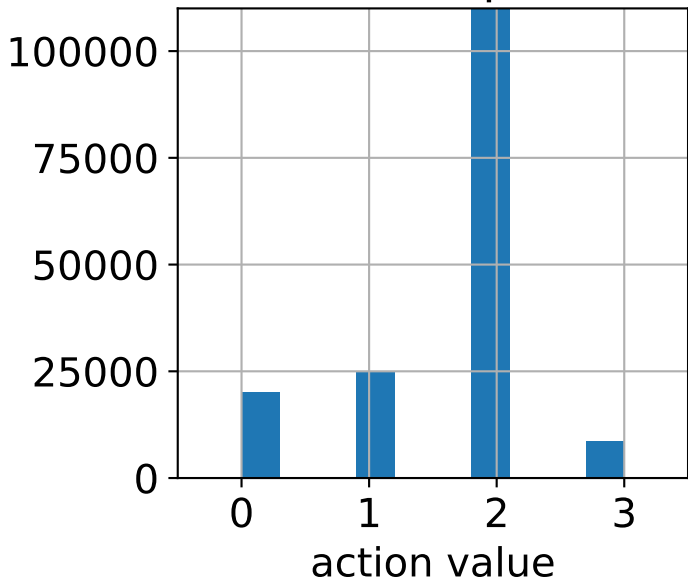

Supplement: supplementary_material [file attachment]

DQN P-T ( $\sigma=0.6$ )

action hist for p0 in ]0.4, 0.2]

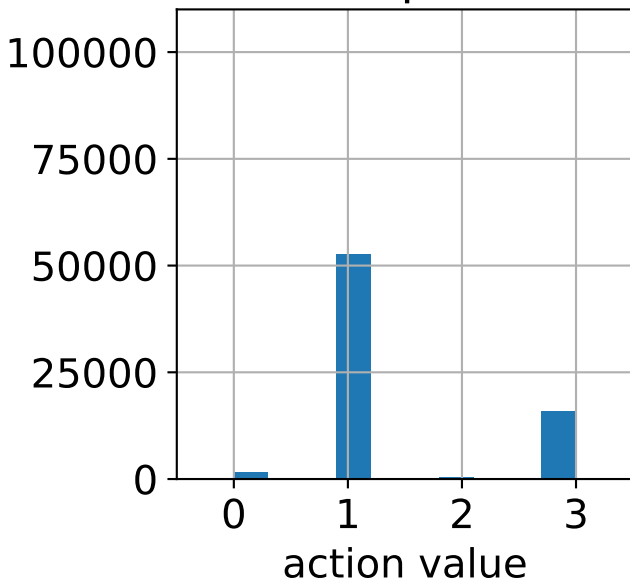

Supplement: supplementary_material [file attachment]

DQN P-H-D-V ( $\sigma=0.4$ )  
action hist for  $p_0 < 0.2$

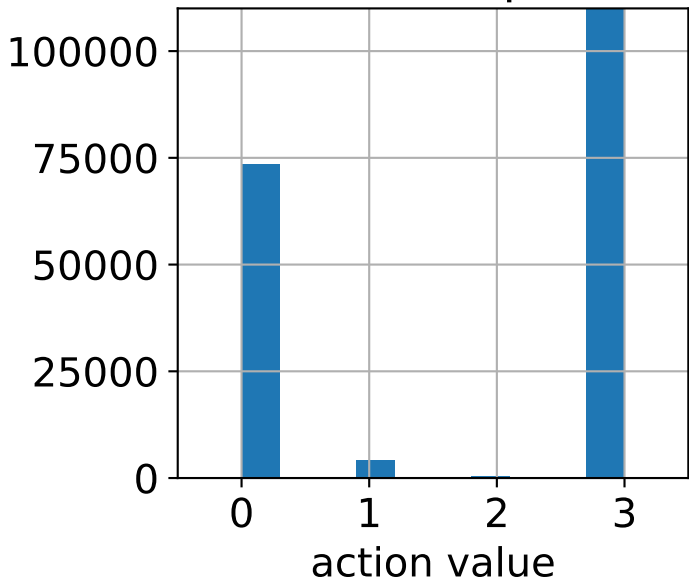

Supplement: supplementary_material [file attachment]

# REINFORCE C-T-V ( $\sigma=0.4$ ) action hist for $p_0 < 0.2$

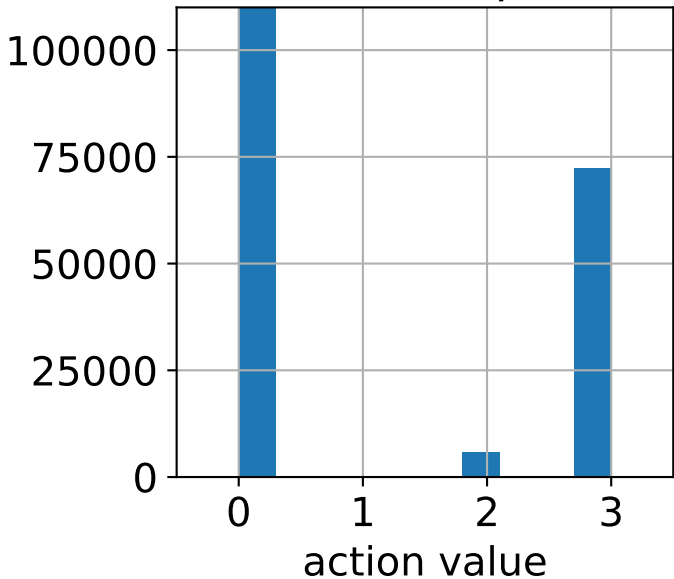

Supplement: supplementary_material [file attachment]

# REINFORCE L-T vs. DQN L-T

$\delta d = 0.4$   $\epsilon d = 0.4$

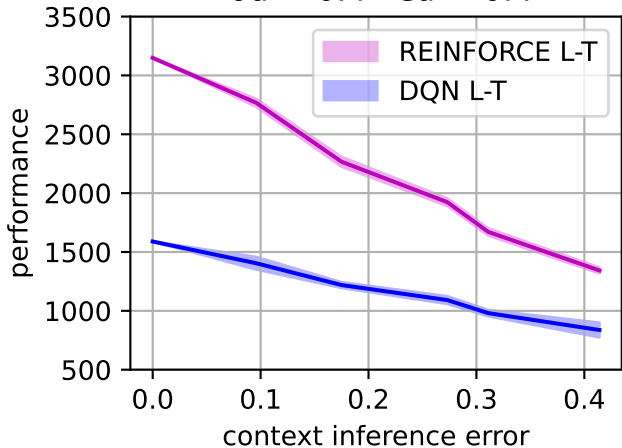

Supplement: supplementary_material [file attachment]

# REINFORCE L-T-V ( $\sigma=0.4$ ) action hist for $p_0 \geq 0.8$

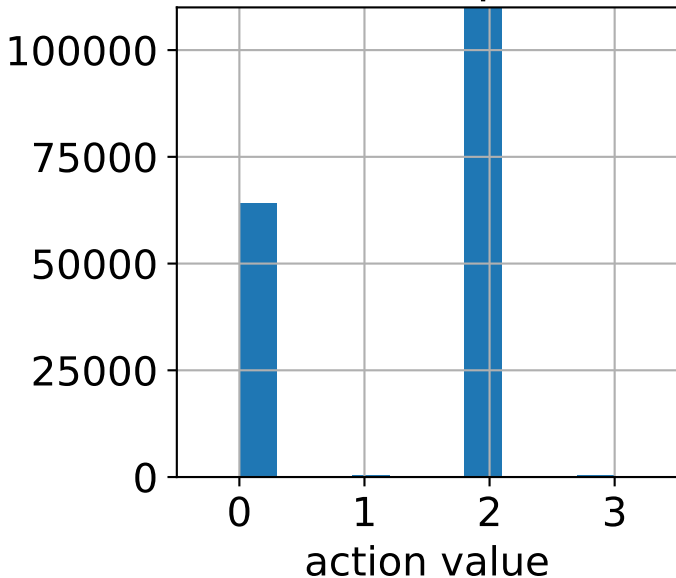

Supplement: supplementary_material [file attachment]

# REINFORCE P-H-D vs. L-H-D

$\delta d = 0.4$     $\epsilon d = 0.1$

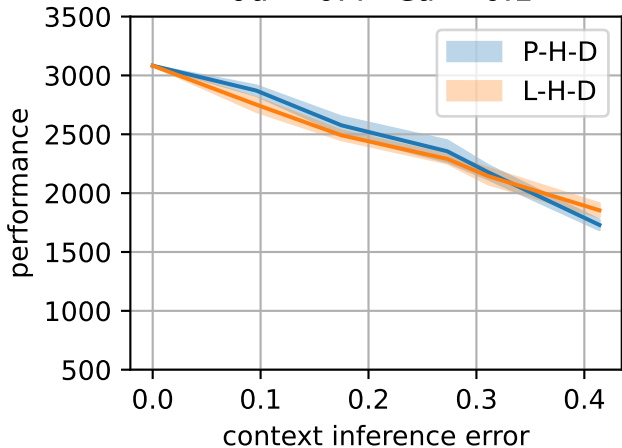

Supplement: supplementary_material [file attachment]

# DQN L-T performance ( $\sigma=0.4$ )

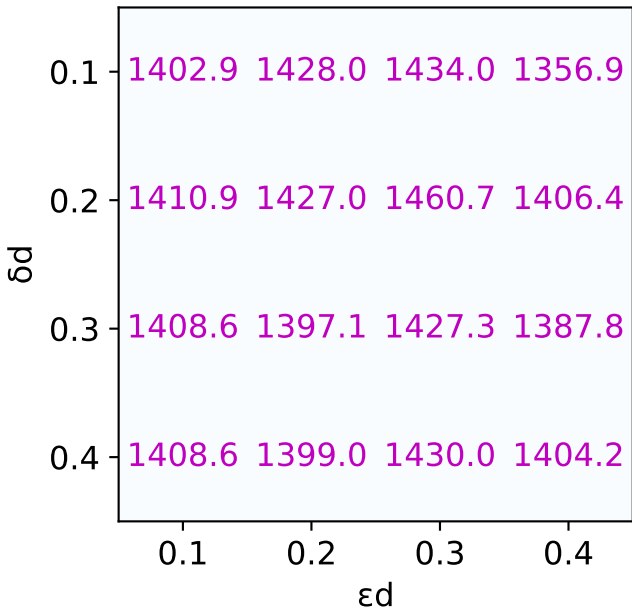

Supplement: supplementary_material [file attachment]

# REINFORCE P-H-D vs. L-H-D

$\delta d = 0.3$     $\varepsilon d = 0.4$

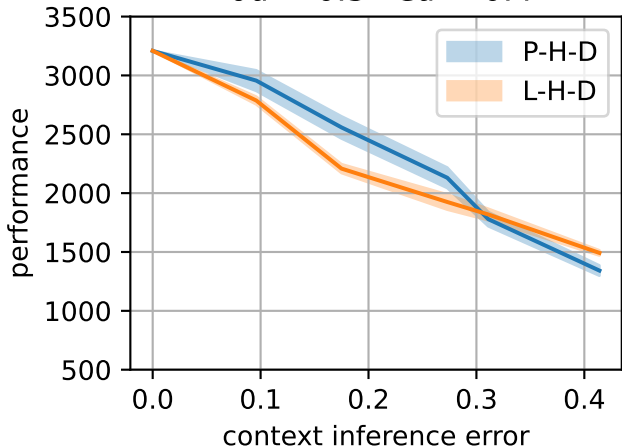

Supplement: supplementary_material [file attachment]

# REINFORCE P-T ( $\sigma=0.6$ )

## action hist for p0 in ]0.4, 0.2]

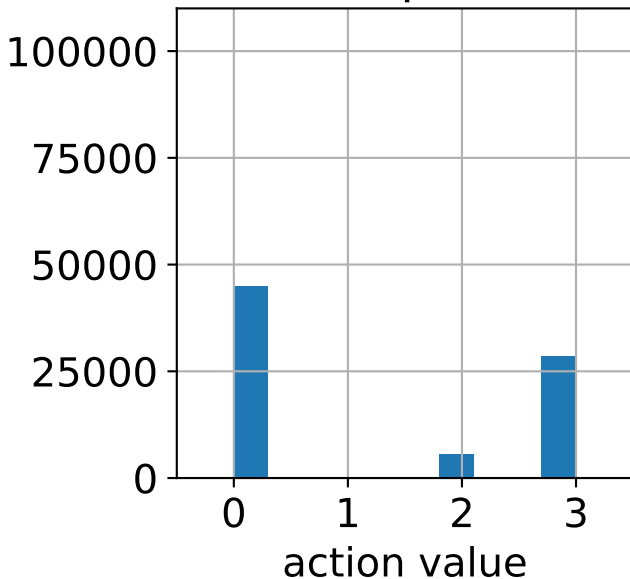

Supplement: supplementary_material [file attachment]

DQN P-H-D ( $\sigma=0.6$ )  
action hist for  $p_0 < 0.2$

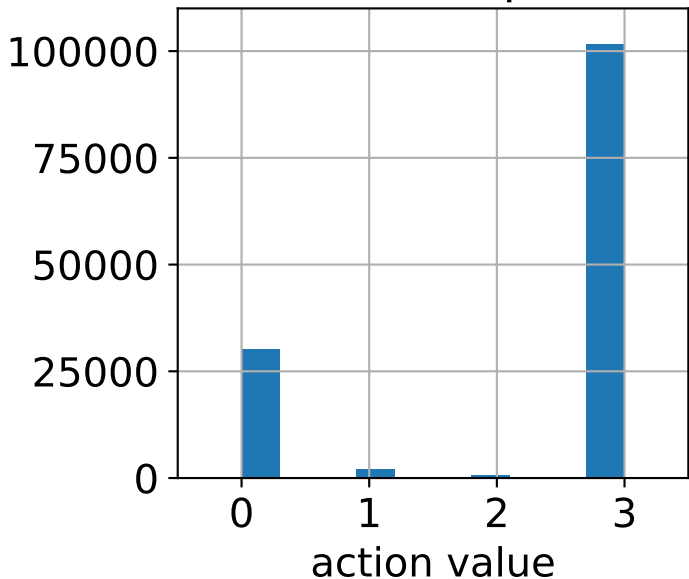

Supplement: supplementary_material [file attachment]

DQN C-T ( $\sigma=0.6$ )  
action hist for  $p_0 < 0.2$

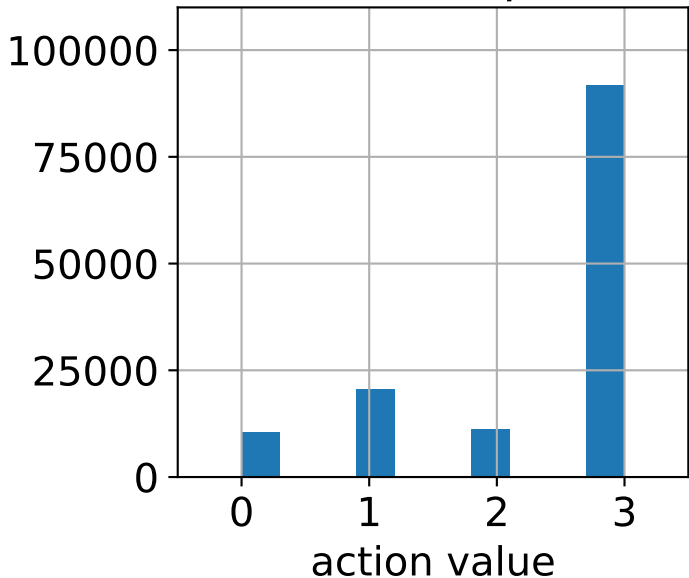

Supplement: supplementary_material [file attachment]

# REINFORCE P-T vs. DQN P-T

$\delta d = 0.2$   $\epsilon d = 0.1$

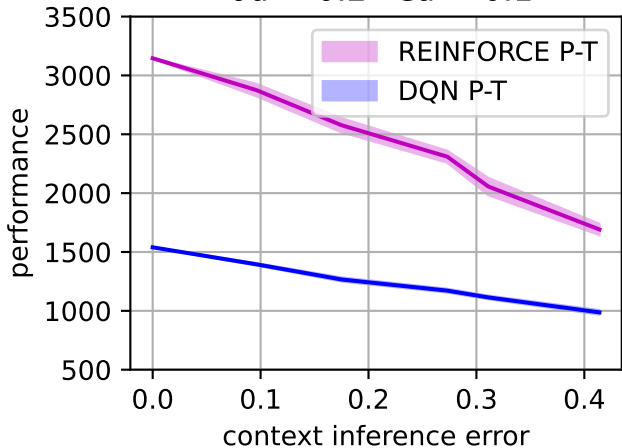

Supplement: supplementary_material [file attachment]

# REINFORCE L-T ( $\sigma=0.6$ ) action hist for p0 in ]0.6, 0.4]

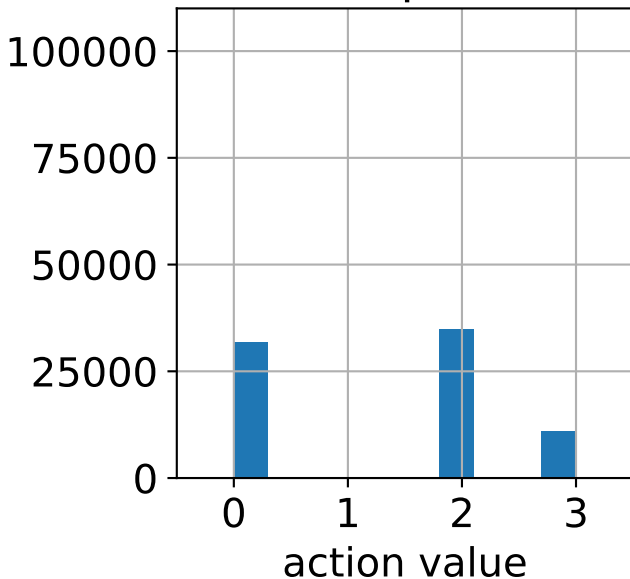

Supplement: supplementary_material [file attachment]

# DQN P-T performance ( $\sigma=0.8$ )

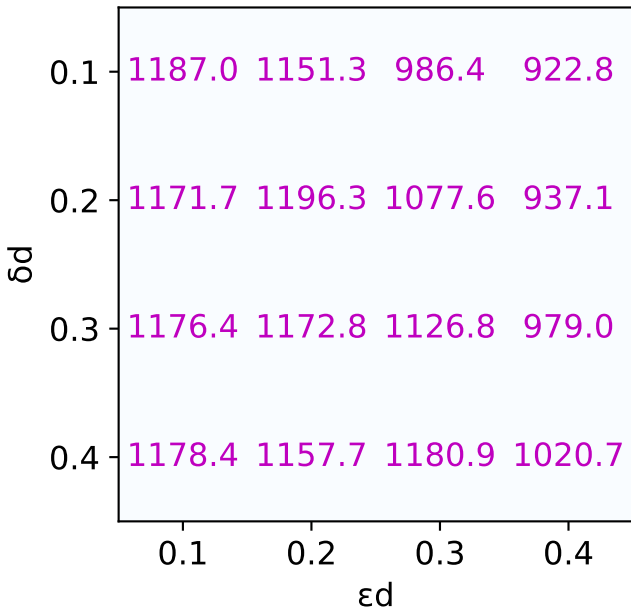

Supplement: supplementary_material [file attachment]

DQN P-H-D  
performance ( $\sigma=1$ )

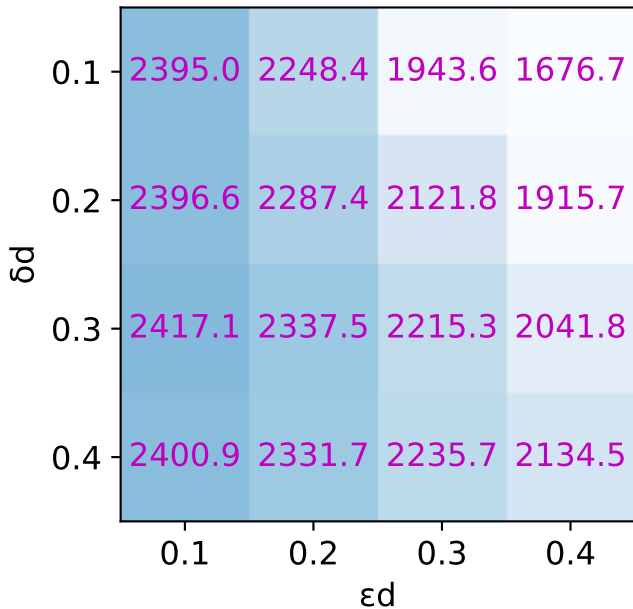

Supplement: supplementary_material [file attachment]

# REINFORCE C-T ( $\sigma=0.6$ ) action hist for p0 in ]0.8, 0.6]

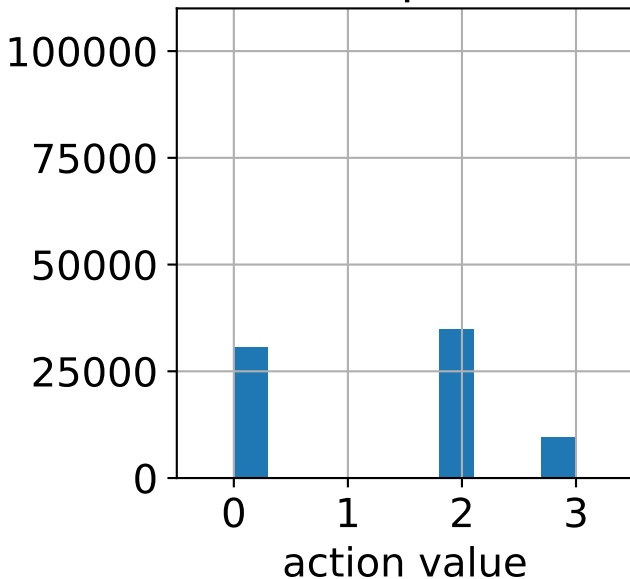

Supplement: supplementary_material [file attachment]

# REINFORCE C-H-D ( $\sigma=0.6$ ) action hist for p0 in ]0.6, 0.4]

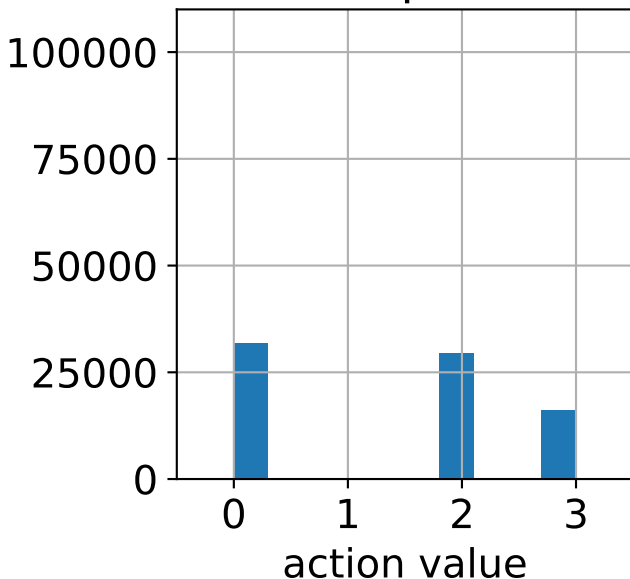

Supplement: supplementary_material [file attachment]

# REINFORCE L-T ( $\sigma=0.6$ )

## action hist for p0 in ]0.8, 0.6]

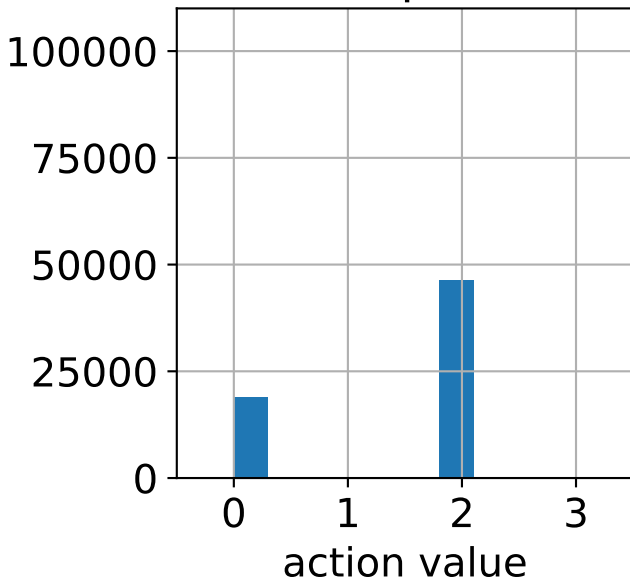

Supplement: supplementary_material [file attachment]

DQN P-H-D-V ( $\sigma=0.4$ )  
action hist for  $p_0 \geq 0.8$

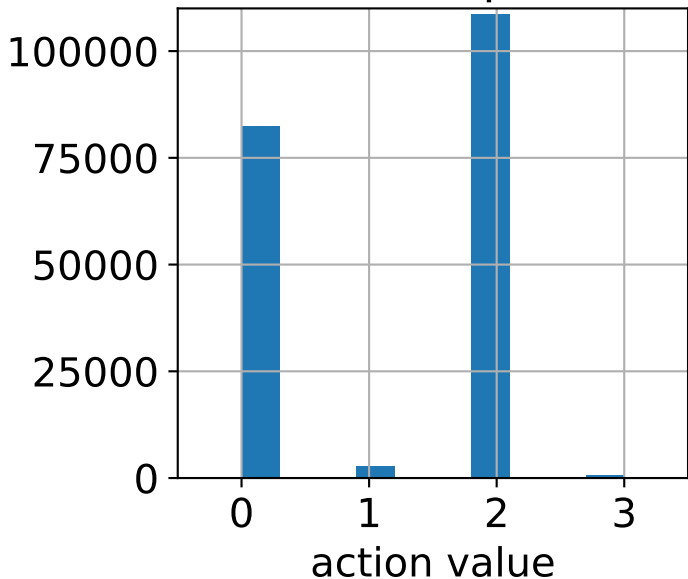

Supplement: supplementary_material [file attachment]

DQN L-T-V ( $\sigma=0.4$ )

action hist for p0 in ]0.8, 0.6]

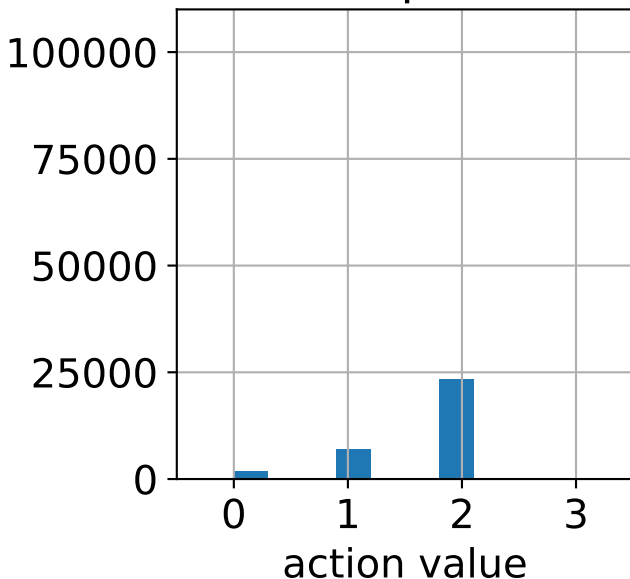

Supplement: supplementary_material [file attachment]

DQN C-H-D-V ( $\sigma=0.4$ )  
action hist for p0 in ]0.8, 0.6]

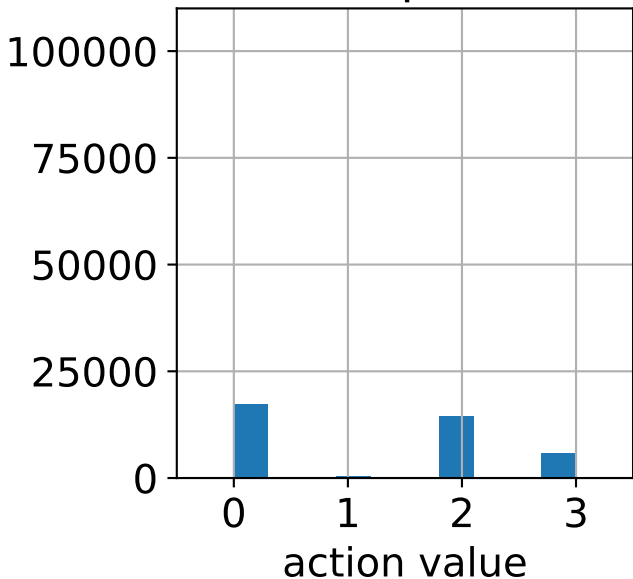

Supplement: supplementary_material [file attachment]

# REINFORCE C-H-D ( $\sigma=0.6$ ) action hist for p0 in ]0.4, 0.2]

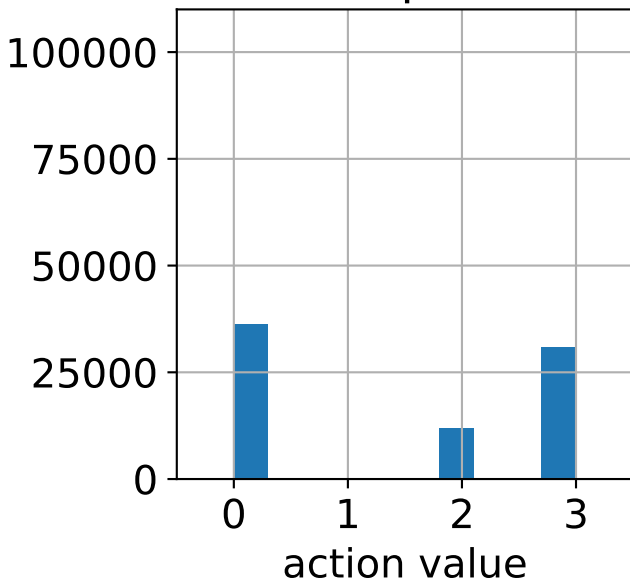

Supplement: supplementary_material [file attachment]

# REINFORCE L-H-D-V ( $\sigma=0.4$ ) action hist for $p_0 \geq 0.8$

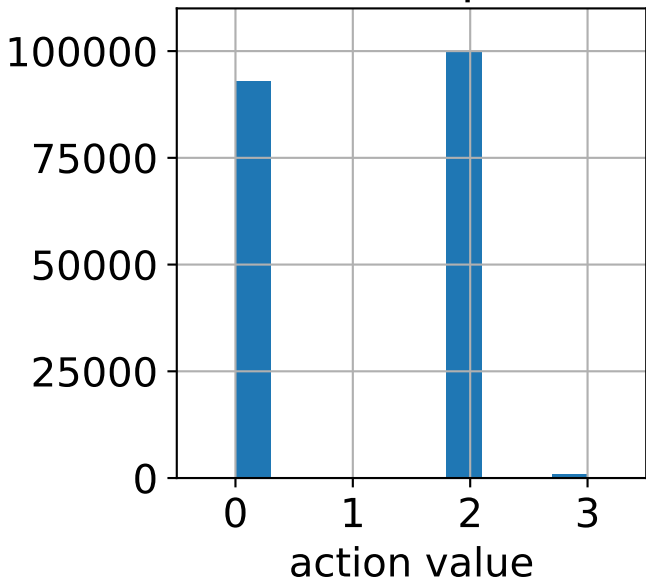

Supplement: supplementary_material [file attachment]

DQN C-H-D-V ( $\sigma=0.4$ )  
action hist for p0 in ]0.8, 0.6]

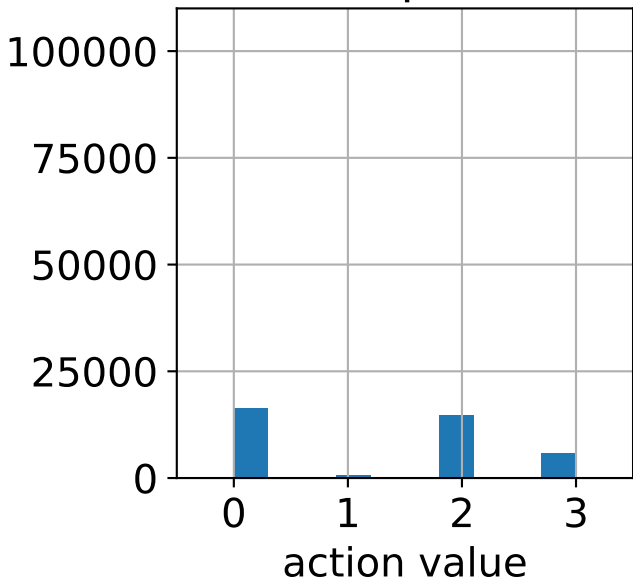

Supplement: supplementary_material [file attachment]

DQN P-H-D vs. L-H-D  
 $\delta d = 0.4$   $\epsilon d = 0.3$

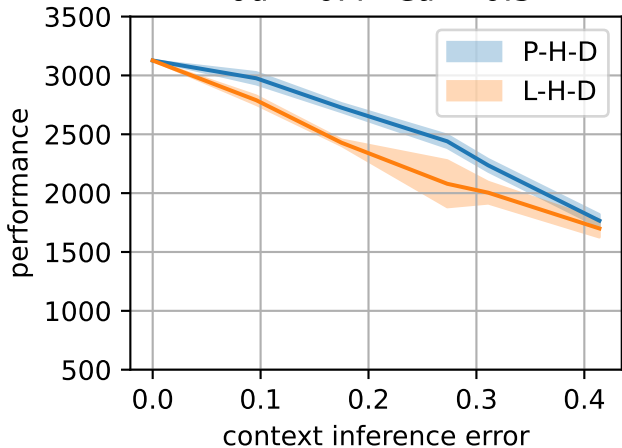

Supplement: supplementary_material [file attachment]

DQN C-T ( $\sigma=0.6$ )  
action hist for  $p_0 \geq 0.8$

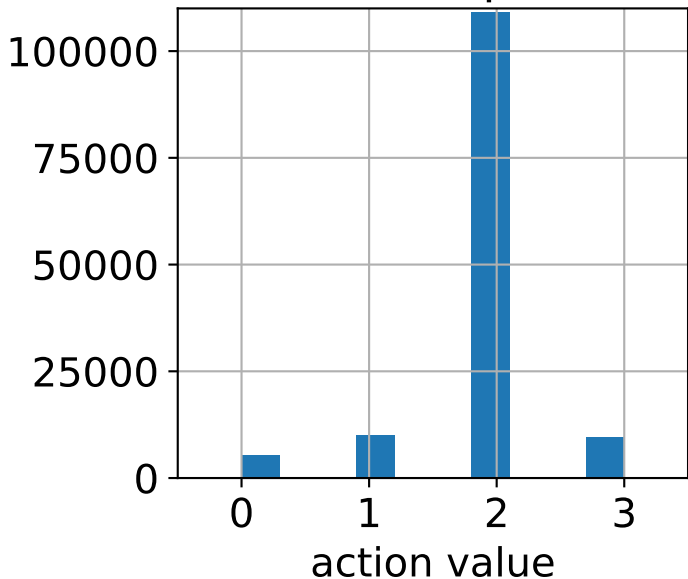

Supplement: supplementary_material [file attachment]

# REINFORCE P-H-D vs. L-H-D

$\delta d = 0.2$   $\epsilon d = 0.3$

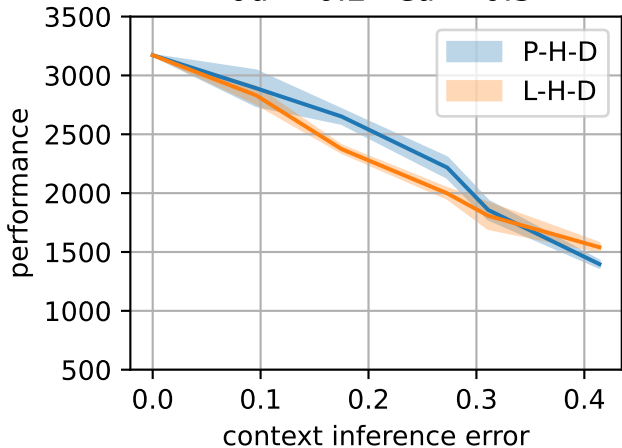

Supplement: supplementary_material [file attachment]

# REINFORCE L-T ( $\sigma=0.6$ ) action hist for $p_0 \geq 0.8$

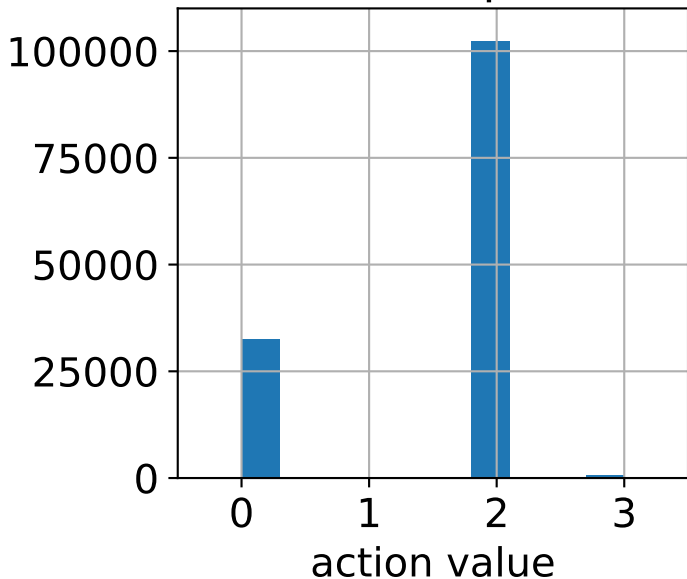

Supplement: supplementary_material [file attachment]

# REINFORCE L-H-D-V ( $\sigma=0.4$ ) action hist for p0 in ]0.4, 0.2]

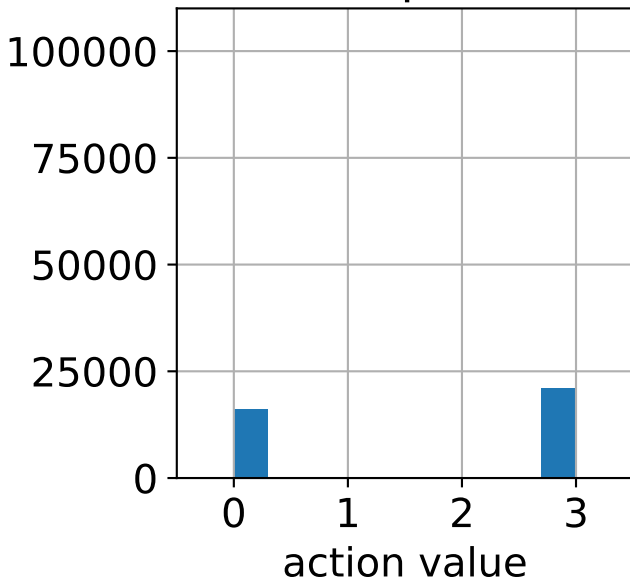

Supplement: supplementary_material [file attachment]

# DQN L-T performance ( $\sigma=0.8$ )

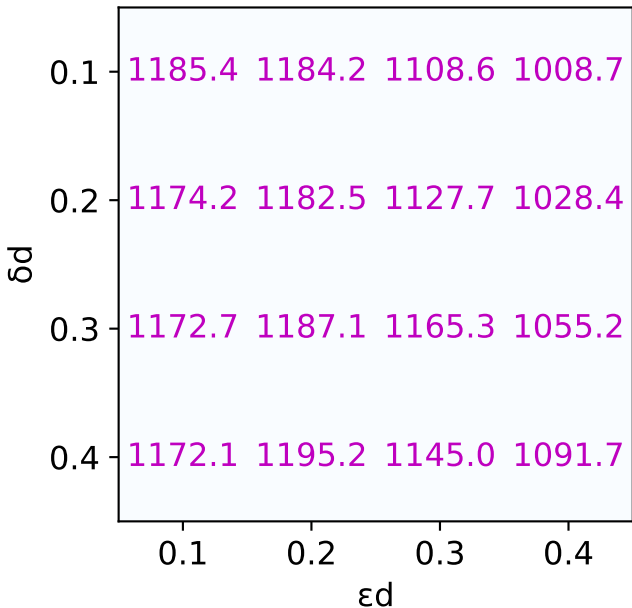

Supplement: supplementary_material [file attachment]

# REINFORCE L-H-D ( $\sigma=0.6$ ) action hist for p0 in ]0.6, 0.4]

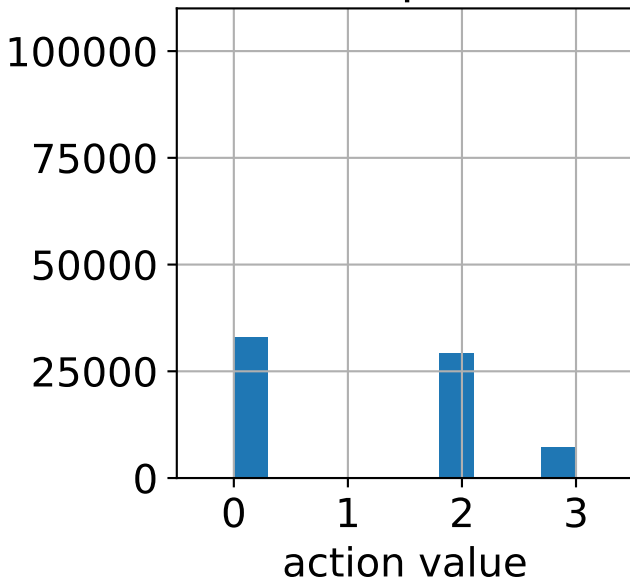

Supplement: supplementary_material [file attachment]

# REINFORCE L-T vs. DQN L-T

$\delta d = 0.1$   $\epsilon d = 0.2$

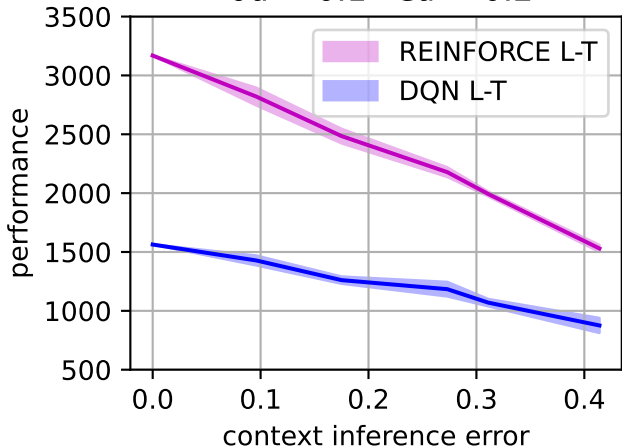

Supplement: supplementary_material [file attachment]

# REINFORCE P-H-D vs. L-H-D

$\delta d = 0.1$     $\varepsilon d = 0.3$

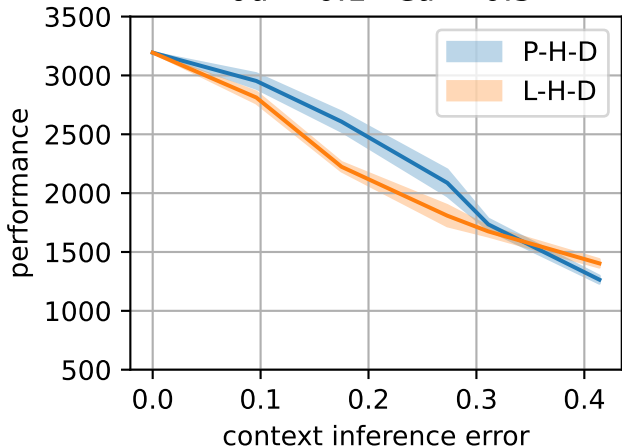

Supplement: supplementary_material [file attachment]

# DQN L-T performance ( $\sigma=0.6$ )

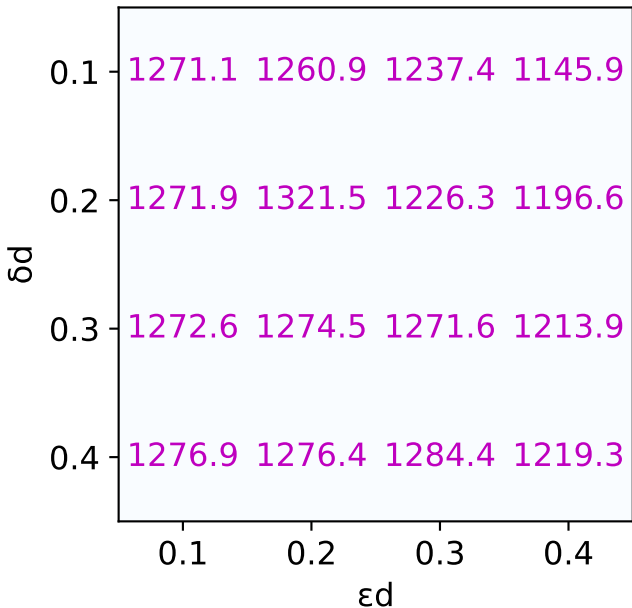

Supplement: supplementary_material [file attachment]

DQN C-T ( $\sigma=0.6$ )  
action hist for  $p_0 \geq 0.8$

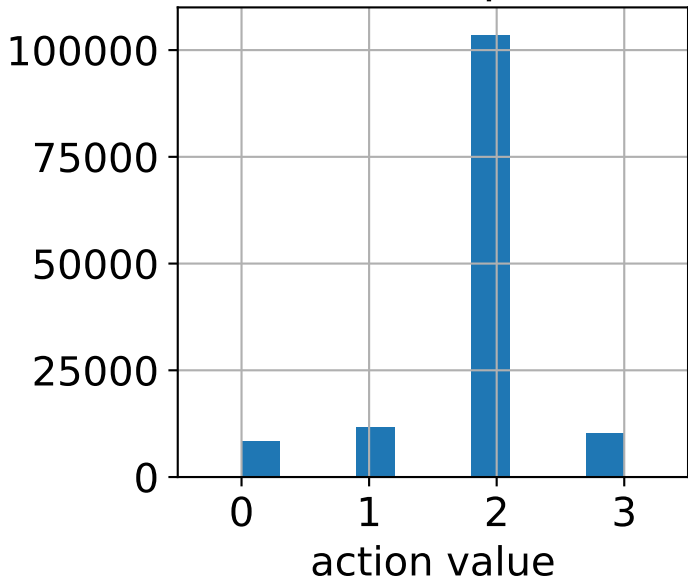

Supplement: supplementary_material [file attachment]

DQN L-H-D ( $\sigma=0.6$ )

action hist for p0 in ]0.6, 0.4]

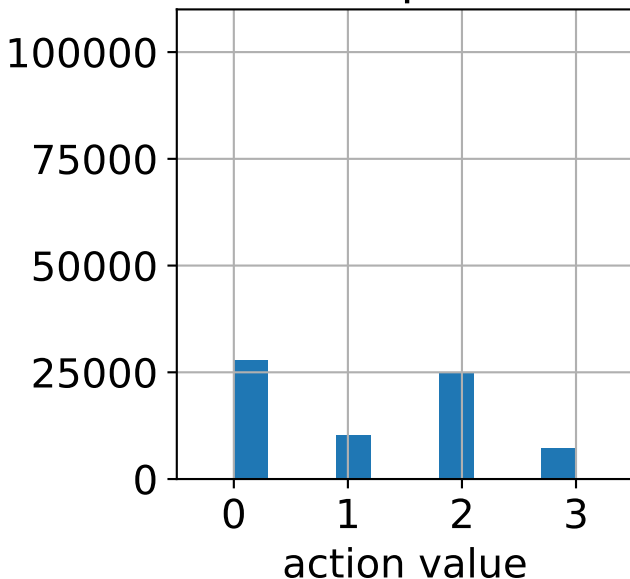

Supplement: supplementary_material [file attachment]

# REINFORCE C-T ( $\sigma=0.6$ ) action hist for $p_0 < 0.2$

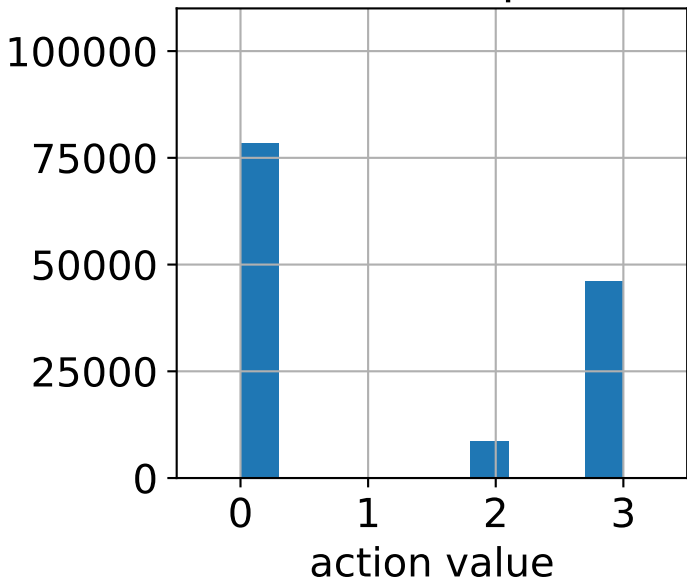

Supplement: supplementary_material [file attachment]

Training C-H-D ( $\sigma=0.4$ )

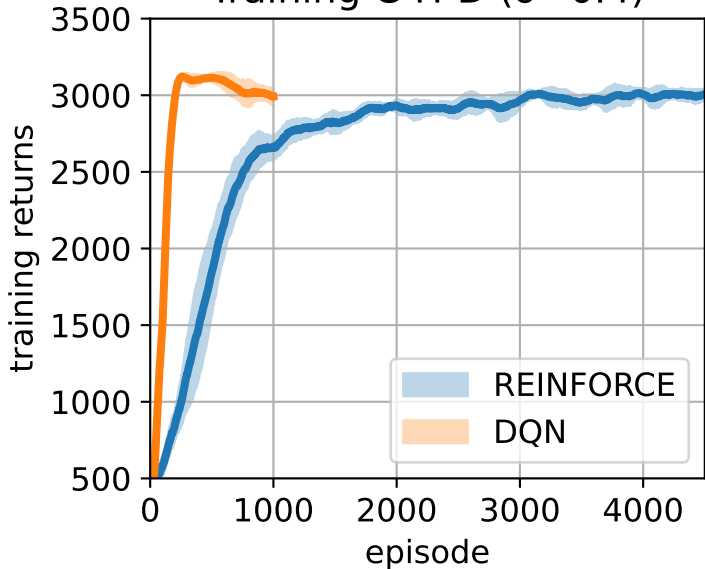

Supplement: supplementary_material [file attachment]

# REINFORCE L-H-D-V ( $\sigma=0.4$ ) action hist for p0 in ]0.8, 0.6]

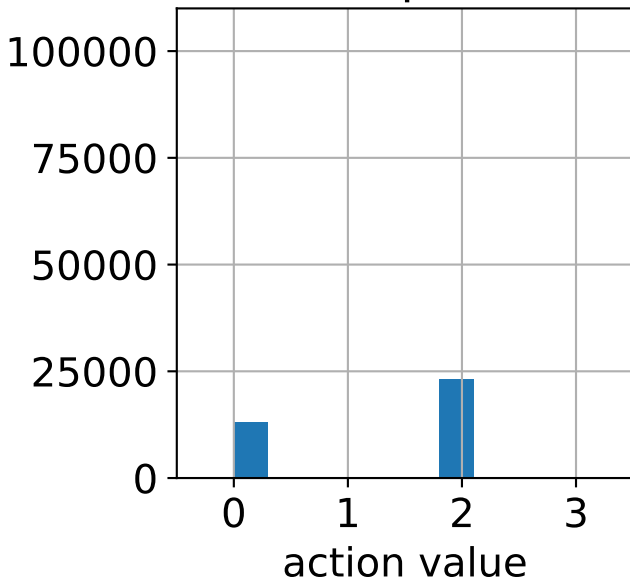

Supplement: supplementary_material [file attachment]

# REINFORCE P-T vs. DQN P-T

$\delta d = 0.3$   $\epsilon d = 0.1$

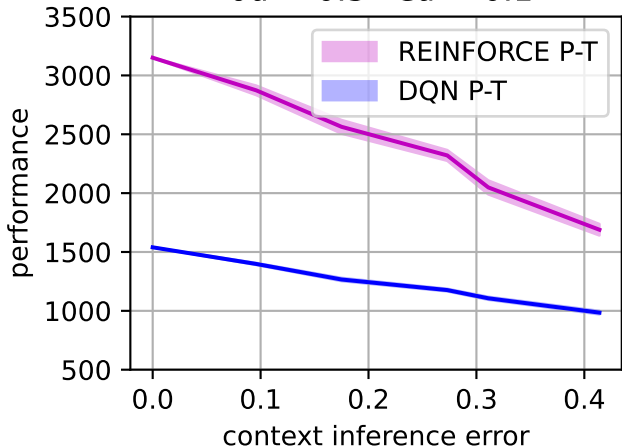

Supplement: supplementary_material [file attachment]

# REINFORCE L-T vs. DQN L-T

$\delta d = 0.1$     $\varepsilon d = 0.4$

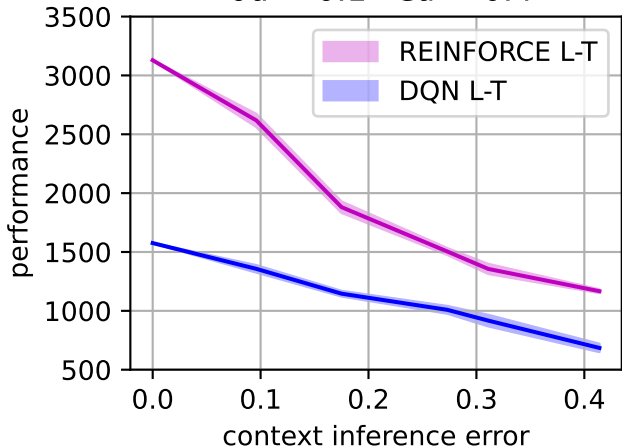

Supplement: supplementary_material [file attachment]

# REINFORCE L-H-D ( $\sigma=0.6$ ) action hist for $p_0 \geq 0.8$

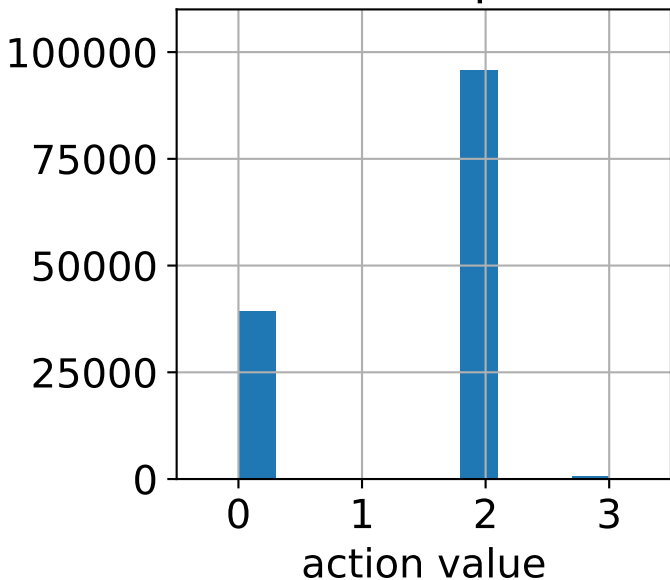

Supplement: supplementary_material [file attachment]

DQN L-T ( $\sigma=0.6$ )  
action hist for  $p_0 < 0.2$

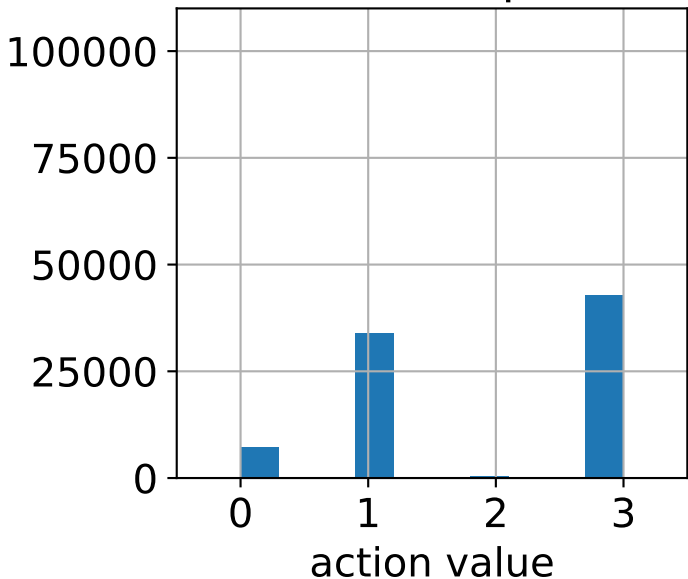

Supplement: supplementary_material [file attachment]

# REINFORCE P-H-D ( $\sigma=0.6$ ) action hist for p0 in ]0.8, 0.6]

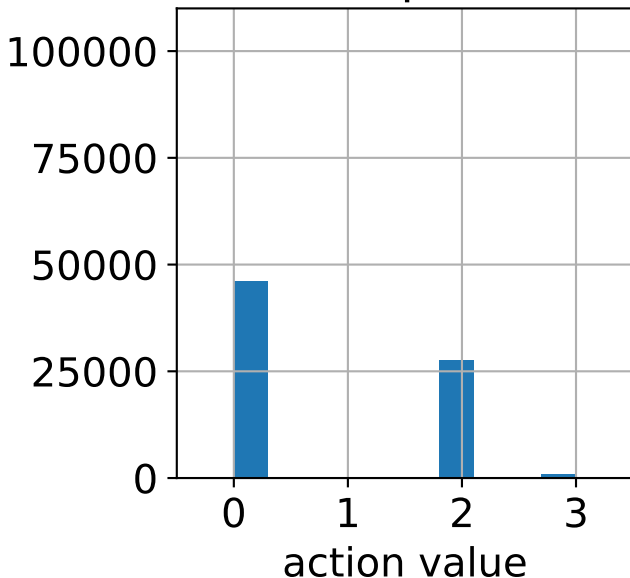

Supplement: supplementary_material [file attachment]

# DQN P-H-D performance ( $\sigma=2$ )

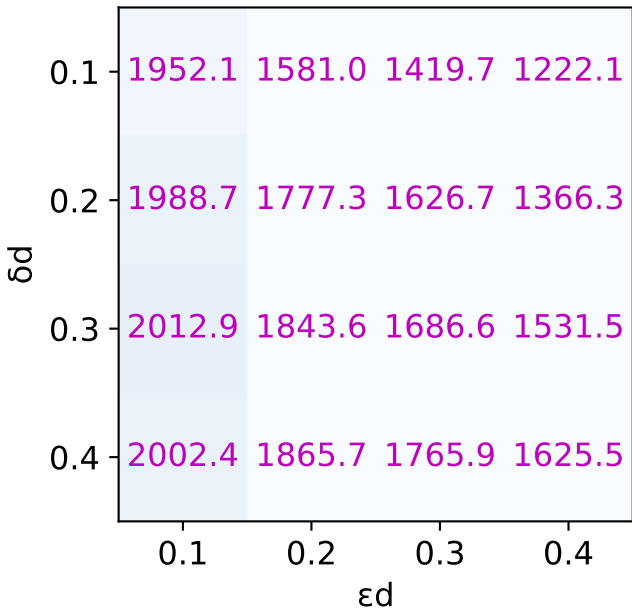

Supplement: supplementary_material [file attachment]

# REINFORCE P-T performance ( $\sigma=2$ )

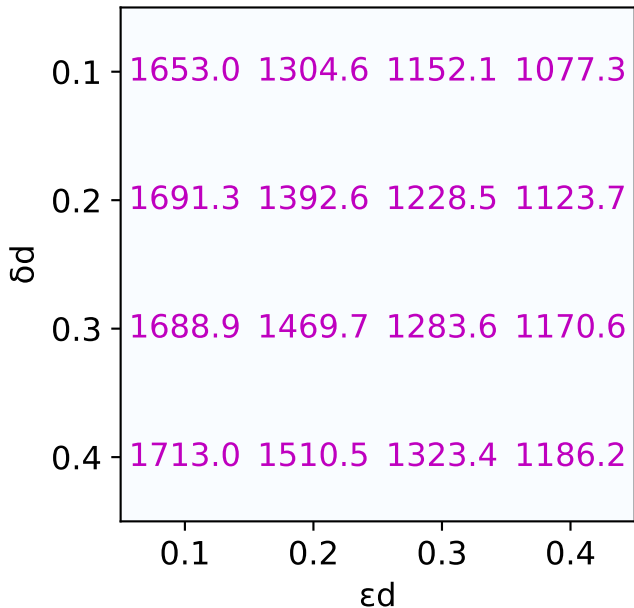

Supplement: supplementary_material [file attachment]

Training C-H-D ( $\sigma=2$ )

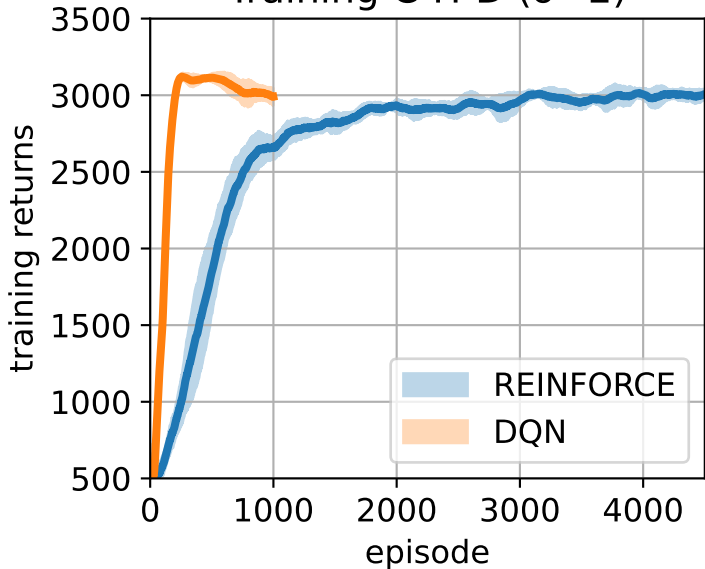

Supplement: supplementary_material [file attachment]

# REINFORCE P-H-D vs. L-H-D

$\delta d = 0.2$     $\varepsilon d = 0.2$

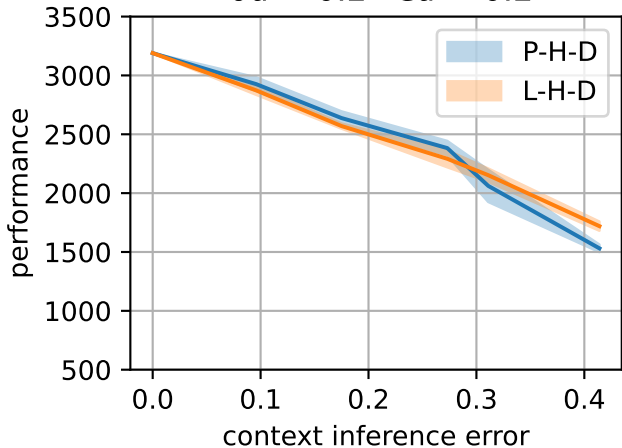

Supplement: supplementary_material [file attachment]

# REINFORCE P-T-V ( $\sigma=0.4$ ) action hist for p0 in ]0.4, 0.2]

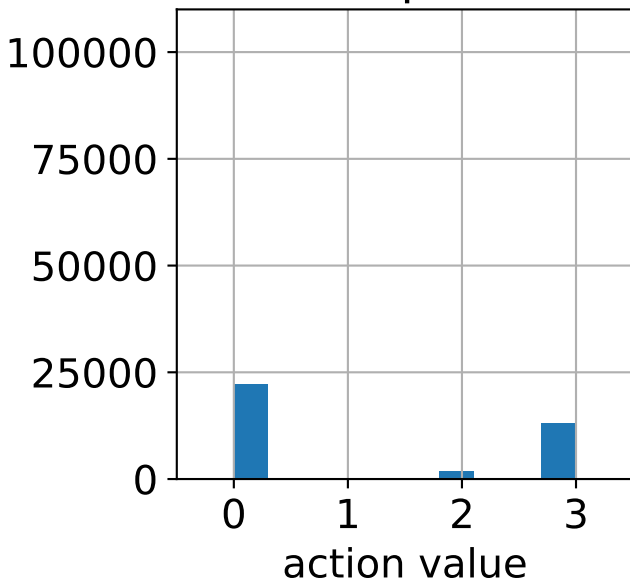

Supplement: supplementary_material [file attachment]

# REINFORCE L-H-D-V ( $\sigma=0.4$ ) action hist for p0 in ]0.4, 0.2]

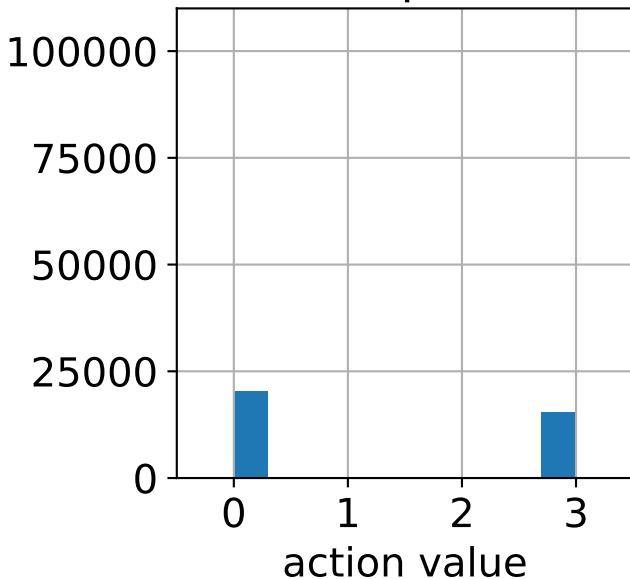

Supplement: supplementary_material [file attachment]
